# Supplementary material for: Oral intake of Lactiplantibacillus pentosus LPG1 Produces a Beneficial Regulation of Gut Microbiota in Healthy Persons: A Randomised, Placebo-Controlled, Single-Blind Trial
Source: Nutrients. 2023 Apr 17;15(8):1931. doi: 10.3390/nu15081931 (PMC10144437; doi:10.3390/nu15081931)
Supplement: Supplementary file 1 [file nutrients-15-01931-s001.zip › Table S2_ASVs_BacterialGenera.xlsx]

## Sheet: 16S_final_table_Percent_genus
Table S2. Oral Lactiplantibacillus pentosus LPG1 produces a beneficial regulation of gut microbiota in healthy persons: a randomised, placebo-controlled, single-blind trial. ASVs bacterial genera detected by the metataxonomic analysis, as a function of the volunteer, group, and phase of study.
							Group (A-LPG1, B - Placebo)					B	B	A	A	B	A	B	A	A	B	A	A	A	A	A	A	B	A	B	A	A	B	B	B	B	B	B	B	B	A	A	A	B	B	B	A	B	B
							Phase (I -Initial-baseline, F- Final-postintervention)					I	I	I	I	I	I	I	I	I	I	I	I	I	I	I	I	I	I	I	I	I	I	I	I	I	I	I	I	I	I	I	I	I	I	F	F	F	F
							Volunteer's code					1	10	11	12	13	14	15	16	17	18	19	2	20	21	22	23	24	26	27	28	29	30	3	31	32	33	34	35	36	37	38	39	40	4	1	2	3	4
							Reference	AI	AF	BI	BF	B-I-1	B-I-10	A-I-11	A-I-12	B-I-13	A-I-14	B-I-15	A-I-16	A-I-17	B-I-18	A-I-19	A-I-2	A-I-20	A-I-21	A-I-22	A-I-23	B-I-24	A-I-26	B-I-27	A-I-28	A-I-29	B-I-30	B-I-3	B-I-31	B-I-32	B-I-33	B-I-34	B-I-35	B-I-36	A-I-37	A-I-38	A-I-39	B-I-40	B-I-4	B-F-1	A-F-2	B-F-3	B-F-4
	asv_id	Kingdom	Phylum	Class	Order	Family	Genus					H1	H10	H11	H12	H13	H14	H15	H16	H17	H18	H19	H2	H20	H21	H22	H23	H24	H25	H26	H27	H28	H29	H3	H30	H31	H32	H33	H34	H35	H36	H37	H38	H39	H4	H40	H41	H42	H43
1	ASV1	Bacteria	Firmicutes	Clostridia	Clostridiales	Ruminococcaceae	Faecalibacterium	11.5473	13.1549	9.88086	13.967	9.12874	6.7781	10.1573	8.03479	7.14801	15.2592	10.4943	10.6425	12.1784	9.6169	13.3239	18.9597	11.4423	11.2849	9.41732	9.14922	12.0442	10.8737	11.2945	8.72996	12.5152	14.6221	10.1064	12.3838	14.0295	6.05513	17.0103	11.7635	12.7297	10.963	11.3095	2.77969	8.78766	3.89985	13.9745	8.70389	12.1899	1.84737
2	ASV10136	Bacteria	Firmicutes	Clostridia	Clostridiales	Christensenellaceae	Catabacter	0.000707204	0.00245646	0.00422574	0.00154492	0	0	0	0	0	0	0	0.00507872	0	0	0	0	0	0	0	0.00906536	0	0	0	0	0	0	0	0	0	0.080289	0	0	0	0	0	0	0	0	0	0	0.01386	0
3	ASV10324	Bacteria	Firmicutes	Bacilli	Lactobacillales	Leuconostocaceae	Leuconostoc	0.00123827	0.00332504	0.0112723	0.0011675	0	0.0569855	0	0	0	0	0	0	0	0	0	0	0	0	0	0	0	0	0	0	0	0	0.0266817	0	0.00611172	0.100361	0.0117474	0	0	0	0.0247654	0	0.0122861	0	0	0	0	0
4	ASV10447	Bacteria	Firmicutes	Clostridia	Clostridiales	Lachnospiraceae	Lachnoclostridium_12	0	0.0251348	0.00345197	0	0	0	0	0	0	0	0	0	0	0	0	0	0	0	0	0	0.0655875	0	0	0	0	0	0	0	0	0	0	0	0	0	0	0	0	0	0	0	0	0
5	ASV1054	Bacteria	Firmicutes	Clostridia	Clostridiales	Ruminococcaceae	Oscillibacter	0.236648	0.414736	0.142002	0.193902	0	0	0.207665	0.333494	0.0444148	0.199914	0.352684	0.507872	0.184319	0.125406	0.105847	0.150673	0.074956	0.0871797	0.138899	0.149578	0.0924187	0.438246	0.211298	0.0709975	0.171603	0.0563364	0.174913	0.119851	0.0763965	0.200723	0.0969163	0.797624	0.200395	0.771882	0.126579	0.581099	0.0921461	0.0565195	0.0630967	0.263223	0.30492	0.0783939
6	ASV10763	Bacteria	Actinobacteria	Actinobacteria	Actinomycetales	Actinomycetaceae	Actinotignum	0.00232291	0	0	0	0	0	0	0	0	0	0	0	0	0	0	0	0	0	0	0	0	0	0	0	0	0	0	0	0	0	0	0	0	0	0	0	0	0	0	0	0	0
7	ASV10771	Bacteria	Proteobacteria	Gammaproteobacteria	Betaproteobacteriales	Neisseriaceae	Neisseria	0	0	0	0.00579752	0	0	0	0	0	0	0	0	0	0	0	0	0	0	0	0	0	0	0	0	0	0	0	0	0	0	0	0	0	0	0	0	0	0	0	0	0	0
8	ASV1079	Bacteria	Firmicutes	Clostridia	Clostridiales	Lachnospiraceae	CAG-56	0.225121	0.242326	0.235912	0.185844	0.124579	0.58885	0	0	0.230402	0.0485506	0.111641	0	0.579671	0	0.126501	0.408074	0.337302	0.440742	0.430585	0.167709	0	0	0.201393	0.204801	0.701204	0.278865	0	0.178554	0.348368	0.220795	0.651982	1.24452	0	0	0.357723	0	0	0.302379	0.455393	0	0	0
9	ASV10950	Bacteria	Firmicutes	Clostridia	Clostridiales	Ruminococcaceae	Ruminococcaceae_UCG-007	0.0056928	0.00539961	0.00398528	0.00435303	0	0	0	0	0.0222074	0	0	0	0	0	0.0309797	0	0	0	0	0.0113317	0.0268312	0	0	0	0	0	0.0266817	0	0	0	0	0	0	0	0.0715445	0	0	0	0	0.0175482	0.0554401	0.0272675
10	ASV11077	Bacteria	Firmicutes	Clostridia	Clostridiales	Ruminococcaceae	Phocea	0.00181942	0.0106044	0.0027402	0.0042605	0	0	0	0	0.00555185	0.0257033	0	0	0.0106852	0.00737681	0	0	0	0	0	0	0	0	0	0	0	0	0	0.0391351	0	0	0	0	0	0	0	0	0	0	0	0.0912505	0.017325	0
11	ASV11280	Bacteria	Actinobacteria	Coriobacteriia	Coriobacteriales	Atopobiaceae	Coriobacteriaceae_UCG-002	0.00247654	0	0	0	0	0	0	0	0	0	0	0	0	0	0	0	0	0	0	0	0	0	0	0	0	0	0	0	0	0	0	0	0	0	0.0495308	0	0	0	0	0	0	0
12	ASV11360	Bacteria	Proteobacteria	Gammaproteobacteria	Enterobacteriales	Enterobacteriaceae	Citrobacter	0	0.00258658	0	0	0	0	0	0	0	0	0	0	0	0	0	0	0	0	0	0	0	0	0	0	0	0	0	0	0	0	0	0	0	0	0	0	0	0	0	0	0	0
13	ASV11733	Bacteria	Actinobacteria	Actinobacteria	Micrococcales	Micrococcaceae	Rothia	0.00564202	0	0	0	0	0	0	0	0	0	0	0	0	0	0	0	0	0.0387465	0	0.0317288	0	0	0	0	0	0	0	0	0	0	0	0	0	0.0113931	0	0	0	0	0	0	0	0
14	ASV11798	Bacteria	Firmicutes	Clostridia	Clostridiales	Ruminococcaceae	Candidatus_Soleaferrea	0.00654067	0.00243309	0.0110903	0.00439439	0	0	0	0	0	0	0	0	0	0	0	0	0	0	0	0	0	0.0257792	0	0.0354988	0.0118347	0	0.0770804	0	0.00305586	0.0234176	0	0	0	0.0427241	0	0.0149768	0	0.0791273	0	0	0	0.0443096
15	ASV12	Bacteria	Firmicutes	Clostridia	Clostridiales	Lachnospiraceae	Agathobacter	4.60903	4.64292	3.60139	1.98229	5.9904	1.51011	0.0213773	1.68466	2.59827	11.1895	0.210596	6.55155	2.01683	7.16288	1.94914	3.15786	3.66708	3.68334	0.710698	7.03699	2.50425	1.09561	3.4468	10.1253	4.01195	2.13515	2.53476	14.6659	1.43931	0.876489	0.81351	2.31368	13.3216	1.83429	1.48317	11.3734	5.14789	0.466286	4.45517	2.38304	3.08732	0.998671
16	ASV12056	Bacteria	Firmicutes	Bacilli	Bacillales	Staphylococcaceae	Staphylococcus	0.00265927	0	0	0	0	0	0	0	0	0	0	0	0	0	0	0	0	0	0	0	0	0	0	0	0	0	0	0	0	0	0	0	0	0	0.00825514	0.0449304	0	0	0	0	0	0
17	ASV12084	Bacteria	Firmicutes	Clostridia	Clostridiales	Family_XI	W5053	0	0	0	0.00269087	0	0	0	0	0	0	0	0	0	0	0	0	0	0	0	0	0	0	0	0	0	0	0	0	0	0	0	0	0	0	0	0	0	0	0	0	0	0.0511265
18	ASV12138	Bacteria	Firmicutes	Clostridia	Clostridiales	Ruminococcaceae	Angelakisella	0.00174887	0.00505424	0.00280435	0.000547106	0.0132531	0	0	0	0	0	0	0.0101574	0	0	0	0	0	0	0	0	0.00894374	0	0	0	0	0	0	0	0	0	0	0	0	0	0.0137586	0	0	0.0310857	0	0	0.010395	0
19	ASV123	Bacteria	Actinobacteria	Coriobacteriia	Coriobacteriales	Coriobacteriaceae	Collinsella	1.03232	0.877999	1.16349	1.10884	0.180242	1.47529	1.23378	3.88847	0.430269	0.134228	0.271491	0.738954	0.72125	0.865545	1.83297	0.693725	3.33554	2.24972	1.15286	0.48953	0.223594	0	1.65407	0.882008	0.837303	1.95769	2.75414	0.618824	0.916758	2.72648	0.302496	0.325272	0.93723	0	0.762224	0.676951	1.09961	1.93014	0.916273	1.46352	3.57242	1.20999
20	ASV12353	Bacteria	Bacteroidetes	Bacteroidia	Bacteroidales	Rikenellaceae	Rikenella	0.000851565	0.00443347	0.00478156	0.0039286	0.0238556	0	0	0	0	0.0142796	0.0126865	0	0	0	0	0	0	0	0	0	0.0327937	0	0	0	0	0	0.0148232	0	0	0.00669075	0	0	0	0	0.00275171	0	0	0	0.0192033	0.0245674	0.0554401	0
21	ASV12358	Bacteria	Firmicutes	Clostridia	Clostridiales	Lachnospiraceae	Moryella	0	0	0	0.00251148	0	0	0	0	0	0	0	0	0	0	0	0	0	0	0	0	0	0	0	0	0	0	0	0	0	0	0	0	0	0	0	0	0	0	0	0	0	0.0477181
22	ASV12469	Bacteria	Proteobacteria	Gammaproteobacteria	Enterobacteriales	Enterobacteriaceae	Buttiauxella	0	0.00963103	0	0	0	0	0	0	0	0	0	0	0	0	0	0	0	0	0	0	0	0	0	0	0	0	0	0	0	0	0	0	0	0	0	0	0	0	0	0	0	0
23	ASV12587	Bacteria	Firmicutes	Bacilli	Bacillales	Family_XI	Gemella	0.00277731	0	0	0.00224986	0	0	0	0.0103142	0	0	0	0	0	0	0	0.0408074	0	0	0	0	0	0	0	0	0	0	0	0	0	0	0	0	0	0	0	0	0	0	0.00823	0	0	0.0272675
24	ASV126	Bacteria	Firmicutes	Clostridia	Clostridiales	Peptostreptococcaceae	Romboutsia	1.27214	0.765002	2.28378	0.662834	0.0821693	2.16861	1.42923	0.835453	0.532978	0.336998	0.525221	0.916709	1.00708	0.735222	2.98696	1.83319	6.09162	0.314816	0.400491	0.435137	2.11072	0.842979	1.09941	0.333142	0.183437	3.25625	0.924965	0.127189	1.23151	3.95089	0.461087	0	0.265138	1.96816	1.27404	0.0928561	0.196578	3.6229	1.47043	2.1865	0.519751	1.52698
25	ASV1267	Bacteria	Firmicutes	Clostridia	Clostridiales	Ruminococcaceae	Ruminococcus_1	2.14477	1.34068	1.96143	1.26983	1.95616	4.42587	2.83402	2.97394	3.20064	0.502642	0.862681	2.66125	1.17804	0.536048	1.30631	0.0470854	1.40398	2.78491	0	2.58136	0.465075	7.81882	2.84262	1.18511	0.402379	0.876032	0.80638	1.9592	3.35534	2.07748	1.91189	0.107481	7.26045	0.185138	3.94596	0	3.03775	1.3819	2.50466	0	0.696466	1.22704
26	ASV13136	Bacteria	Fusobacteria	Fusobacteriia	Fusobacteriales	Leptotrichiaceae	Leptotrichia	0	0	0.000258835	0.00169683	0	0	0	0	0	0	0	0	0	0.00491787	0	0	0	0	0	0	0	0	0	0	0	0	0	0	0	0	0	0	0	0	0	0	0	0	0	0	0	0
27	ASV1326	Bacteria	Firmicutes	Bacilli	Lactobacillales	Streptococcaceae	Streptococcus	0.507851	0.221217	0.385493	0.190954	0.220002	0.918099	0.794014	0.924844	0.0582945	0	0.182685	0.0888776	0.0667824	0.445067	0	0.794174	0.939833	0.682908	0.210663	0.0407941	0.247444	0.654791	0	0.204801	0.124264	0.999972	0.142302	0.432932	0.449212	0.140506	0.138032	0	0.524109	1.08519	0.621887	0.356448	0.285653	1.11626	0.27982	0.354473	0	0.39197
28	ASV13298	Bacteria	Actinobacteria	Actinobacteria	Bifidobacteriales	Bifidobacteriaceae	Gardnerella	0.00251644	0.000350963	0	0	0	0	0	0	0	0	0	0	0	0	0	0	0	0	0	0	0	0.0283571	0	0.00546135	0	0	0	0	0	0	0	0	0	0	0.0165103	0	0	0	0	0.00701927	0	0
29	ASV13327	Bacteria	Actinobacteria	Coriobacteriia	Coriobacteriales	Atopobiaceae	Atopobium	0.00202335	0.000277624	0.00224886	0.000896956	0	0	0	0.0137523	0	0	0	0	0	0	0	0.00941708	0.0172975	0	0	0	0	0	0	0	0	0	0.00592926	0	0	0.0367991	0	0	0	0	0	0	0	0	0	0	0	0.0170422
30	ASV13583	Bacteria	Firmicutes	Clostridia	Clostridiales	Ruminococcaceae	Anaerofilum	0.0115423	0.0130855	0.0104208	0.00757138	0.00795186	0	0.0152695	0.0137523	0	0	0.0050746	0.0101574	0	0	0.0283981	0	0.0317122	0.0121083	0.0138899	0.0158644	0.011925	0	0.00660306	0.0109227	0.008876	0.0169009	0	0	0.0427821	0.0434899	0	0	0.00924898	0.0484206	0.019262	0	0.0153577	0.0339117	0.00274333	0	0	0
31	ASV13619	Bacteria	Firmicutes	Clostridia	Clostridiales	Eubacteriaceae	Anaerofustis	0.00183381	0	0.000156033	0.000717565	0	0	0	0	0	0	0	0	0	0	0.0258164	0	0	0	0.00231498	0	0	0	0	0	0	0	0.00296463	0	0	0	0	0	0	0.00854482	0	0	0	0	0	0	0	0.0136337
32	ASV13687	Bacteria	Firmicutes	Clostridia	Clostridiales	Lachnospiraceae	possible_genus_Sk018	0	0.000303933	0.00176072	0.000297783	0	0	0	0	0	0	0	0	0	0	0	0	0	0	0	0	0	0	0	0	0	0	0	0	0	0.0334538	0	0	0	0	0	0	0	0	0	0	0	0
33	ASV13724	Archaea	Euryarchaeota	Thermoplasmata	Methanomassiliicoccales	Methanomassiliicoccaceae	Methanomassiliicoccus	0	0	0.00148736	0	0	0	0	0	0	0	0	0	0	0	0	0	0	0	0	0	0	0	0	0	0	0	0	0	0	0	0	0	0	0	0	0	0	0.0282598	0	0	0	0
34	ASV1389	Bacteria	Firmicutes	Erysipelotrichia	Erysipelotrichales	Erysipelotrichaceae	Turicibacter	0.175875	0.0935366	0.213671	0.0708885	0	0.424225	0	0.299113	0.455252	0	0	0	0.41138	0	0.289144	0	0.645775	0	0	0.126915	0.387562	0	0.00660306	0	0	0.6028	0	0.0317973	0	0.13716	0.223201	0	0.0709089	0.404455	0.599873	0	0	1.70124	0	0.343944	0.010395	0.385153
35	ASV1390	Bacteria	Firmicutes	Clostridia	Clostridiales	Ruminococcaceae	Ruminiclostridium_5	0.380373	0.233291	0.25575	0.215595	0.227953	0.107639	0.216827	0.367875	0.2998	0.188491	0.210596	0.617064	0.438093	0.0737681	1.0688	0.207176	0.608297	0.0823364	0.171308	0.471399	0.342844	0.255214	0.227805	0.109227	0.284032	0.104222	0.595891	0.320419	0.660066	0.190686	0.0176211	0.376184	0.0955728	0.216469	0.51457	0.317508	0.0737169	0.367377	0.290793	0.301829	0.776161	0.39197
36	ASV13976	Bacteria	Bacteroidetes	Bacteroidia	Bacteroidales	Rikenellaceae	Millionella	0	0.00133021	0	0	0	0	0	0	0	0	0	0	0	0	0	0	0	0	0	0	0	0	0	0	0	0	0	0	0	0	0	0	0	0	0	0	0	0	0	0	0	0
37	ASV1405	Archaea	Euryarchaeota	Methanobacteria	Methanobacteriales	Methanobacteriaceae	Methanobrevibacter	0.0163146	0.00474046	0.221781	0.0836404	0.386991	0.132966	0	0	0.169332	0	0.41358	0	0.106852	0.0663913	0.21944	0	0	0	0	0	0.417375	0	0.264122	0	0	0.298583	0.32611	0.15654	0.400318	0.475043	0	0	0	0	0	0	0	0.706494	0.17283	0	0.609841	0.272675
38	ASV14104	Bacteria	Firmicutes	Clostridia	Clostridiales	Ruminococcaceae	Acetanaerobacterium	0.00171928	0	0.00296199	0.00319083	0	0	0	0	0	0	0	0	0	0	0	0.0313903	0	0	0	0	0	0	0.00660306	0	0	0	0	0	0	0	0	0.031113	0.012332	0	0	0.00299536	0	0	0	0	0.02772	0
39	ASV14208	Bacteria	Proteobacteria	Gammaproteobacteria	Betaproteobacteriales	Burkholderiaceae	Comamonas	0	0.0013677	0	0	0	0	0	0	0	0	0	0	0	0	0	0	0	0	0	0	0	0	0	0	0	0	0	0	0	0	0	0	0	0	0	0	0	0	0	0	0	0
40	ASV1429	Bacteria	Firmicutes	Clostridia	Clostridiales	Peptostreptococcaceae	Intestinibacter	0.199163	0.168706	0.157168	0.0563762	0.622896	0	0.274851	0.364436	0	0.122805	0	0.132047	0	0	1.06106	0.19462	0.533341	0	0.280112	0.163177	0.778106	0	0	0	0	0	0	0	0	0	0.675477	0	0.132569	0.498448	0	0.0299536	0	0.777144	0.06584	0	0	0.293125
41	ASV14376	Bacteria	Firmicutes	Bacilli	Lactobacillales	Lactobacillaceae	Pediococcus	0	0	0	0.0014885	0	0	0	0	0	0	0	0	0	0	0	0	0	0	0	0	0	0	0	0	0	0	0	0	0	0	0	0	0	0	0	0	0	0	0	0	0	0
42	ASV1444	Bacteria	Firmicutes	Clostridia	Clostridiales	Lachnospiraceae	Lachnospiraceae_UCG-010	0.20236	0.263386	0.147028	0.223557	0.180242	0.0633172	0.0366468	0.0481331	0.108261	0.13994	0.144626	0.180295	0.400695	0.118029	0.0309797	0.269956	0	0.0460115	0.175938	0.219835	0.149062	0.0876492	0.277328	0.270337	0.588775	0.138024	0.237171	0.0905	0.226134	0.13047	0.129222	0.469523	0	0.401606	0.134834	0.0688932	0.242651	0.0367377	0.0713267	0.263223	0.038115	0.0749855
43	ASV15058	Bacteria	Actinobacteria	Actinobacteria	Bifidobacteriales	Bifidobacteriaceae	Pseudoscardovia	0.00186584	0.00313775	0.000296508	0.00204943	0	0	0	0.0171904	0	0.00571184	0	0	0	0	0	0	0.0144146	0	0	0	0	0	0	0	0	0.00563364	0	0	0	0	0	0	0	0	0	0	0	0	0	0	0	0
44	ASV15080	Bacteria	Firmicutes	Clostridia	Clostridiales	Ruminococcaceae	Ruminococcaceae_V9D2013_group	0	0.00013009	0.00175939	0.00117136	0.021205	0	0	0	0	0	0	0	0	0	0	0	0	0	0	0	0	0	0	0	0	0	0	0	0.0122234	0	0	0	0	0	0	0	0	0	0	0	0	0
45	ASV15311	Bacteria	Proteobacteria	Gammaproteobacteria	Pasteurellales	Pasteurellaceae	Aggregatibacter	0	0	0.000776506	0	0	0	0	0	0	0	0	0	0	0.0147536	0	0	0	0	0	0	0	0	0	0	0	0	0	0	0	0	0	0	0	0	0	0	0	0	0	0	0	0
46	ASV15418	Bacteria	Actinobacteria	Actinobacteria	Corynebacteriales	Corynebacteriaceae	Corynebacterium	0.000854482	0.000431096	0	0	0	0	0	0	0	0	0	0	0	0	0	0	0	0	0	0	0	0	0	0	0	0	0	0	0	0	0	0	0	0.0170896	0	0	0	0	0	0	0	0
47	ASV15693	Bacteria	Firmicutes	Negativicutes	Selenomonadales	Acidaminococcaceae	Succinispira	0.000285592	0.00276405	0.000347529	0.000815235	0	0	0	0	0	0.00571184	0	0	0	0	0	0	0	0	0	0	0	0	0.00660306	0	0	0	0	0	0	0	0	0	0	0	0	0	0	0	0	0	0	0
48	ASV15807	Bacteria	Firmicutes	Clostridia	Clostridiales	Ruminococcaceae	Sporobacter	0	0	0.000730507	0	0	0	0	0	0.0138796	0	0	0	0	0	0	0	0	0	0	0	0	0	0	0	0	0	0	0	0	0	0	0	0	0	0	0	0	0	0	0	0	0
49	ASV15866	Bacteria	Firmicutes	Erysipelotrichia	Erysipelotrichales	Erysipelotrichaceae	Kandleria	0.000720731	0.000127691	0.000619229	0.000855098	0	0	0	0	0	0	0.0050746	0	0	0	0	0	0.0144146	0	0	0	0	0	0	0	0	0	0	0	0	0.00669075	0	0	0	0	0	0	0	0	0	0	0	0
50	ASV15870	Bacteria	Actinobacteria	Actinobacteria	Corynebacteriales	Corynebacteriaceae	Corynebacterium_1	0.000605415	0	0	0	0	0	0	0	0	0	0	0	0	0	0	0	0	0.0121083	0	0	0	0	0	0	0	0	0	0	0	0	0	0	0	0	0	0	0	0	0	0	0	0
51	ASV16033	Bacteria	Firmicutes	Negativicutes	Selenomonadales	Veillonellaceae	Negativicoccus	0	0	0	0.000896956	0	0	0	0	0	0	0	0	0	0	0	0	0	0	0	0	0	0	0	0	0	0	0	0	0	0	0	0	0	0	0	0	0	0	0	0	0	0.0170422
52	ASV162	Bacteria	Bacteroidetes	Bacteroidia	Bacteroidales	Rikenellaceae	Alistipes	2.02566	3.24696	1.80827	2.59141	3.1887	1.24418	1.07497	0.952348	2.21519	3.15865	1.2585	5.27679	2.72472	1.83191	2.55841	1.43767	1.89696	0.711968	2.53027	1.99891	3.17503	0.337707	0.973951	2.35657	2.13616	0.805611	2.82826	3.4659	1.48209	0.00334538	1.38032	3.97681	2.42323	3.00493	2.03902	1.72533	1.07197	2.33426	2.80917	2.65679	3.31601	2.13709
53	ASV16348	Bacteria	Firmicutes	Bacilli	Lactobacillales	Streptococcaceae	Anthococcus	0.000571184	0.00135853	0.00074433	0.000905888	0	0	0	0	0	0.0114237	0	0	0	0	0	0	0	0	0	0	0	0	0	0	0	0	0	0	0	0	0	0.0141423	0	0	0	0	0	0	0	0	0.010395	0.00681686
54	ASV16401	Bacteria	Firmicutes	Clostridia	Clostridiales	Lachnospiraceae	Lachnospiraceae_UCG-006	0.000627806	0	0	0	0	0	0	0	0	0	0	0	0	0	0	0.0125561	0	0	0	0	0	0	0	0	0	0	0	0	0	0	0	0	0	0	0	0	0	0	0	0	0	0
55	ASV1641	Bacteria	Bacteroidetes	Bacteroidia	Bacteroidales	Barnesiellaceae	Barnesiella	0.958687	1.16682	0.612745	0.692002	0.750126	0	1.31929	0	0.816123	0.825361	0.542982	0.563738	0.577	0.656536	0.97328	0.577581	0.755326	0.242166	0.574114	1.41646	0.673762	0.188188	0.217901	1.59198	0.834344	0.194361	1.21253	0.584581	1.2254	0	0.146843	0.203649	1.01431	2.36976	1.41988	2.99835	0.221151	2.79489	0.56787	1.01428	1.91268	0.886192
56	ASV16518	Bacteria	Proteobacteria	Gammaproteobacteria	Pseudomonadales	Pseudomonadaceae	Azorhizophilus	0	0.000292594	0.000618286	0.000679363	0	0	0	0	0	0	0	0	0	0	0	0	0	0	0	0	0	0	0	0	0	0	0	0	0	0	0.0117474	0	0	0	0	0	0	0	0	0	0	0
57	ASV16752	Bacteria	Firmicutes	Bacilli	Lactobacillales	Enterococcaceae	Melissococcus	0	0.000127584	0	0.0022219	0	0	0	0	0	0	0	0	0	0	0	0	0	0	0	0	0	0	0	0	0	0	0	0	0	0	0	0	0	0	0	0	0	0	0	0	0	0
58	ASV16817	Bacteria	Proteobacteria	Gammaproteobacteria	Enterobacteriales	Enterobacteriaceae	Nissabacter	0	0.000794299	0	0	0	0	0	0	0	0	0	0	0	0	0	0	0	0	0	0	0	0	0	0	0	0	0	0	0	0	0	0	0	0	0	0	0	0	0	0	0	0
59	ASV1701	Bacteria	Firmicutes	Clostridia	Clostridiales	Lachnospiraceae	Lachnospiraceae_UCG-001	0.121926	0.156696	0.141917	0.221757	0	0.376737	0.164911	0	0.338663	0.151364	0	0	0	0	0.356267	0.216593	0	0.220371	0.407436	0.201704	0.0834749	0	0	0	0.352081	0	0.0948682	0	0.446156	0.361301	0.358297	0	0.194229	0	0	0	0	0.0876053	0	0	0.568261	0
60	ASV17198	Bacteria	Firmicutes	Clostridia	Clostridiales	Ruminococcaceae	Fournierella	0.000432439	0	0	0	0	0	0	0	0	0	0	0	0	0	0	0	0.00864877	0	0	0	0	0	0	0	0	0	0	0	0	0	0	0	0	0	0	0	0	0	0	0	0	0
61	ASV17240	Bacteria	Firmicutes	Clostridia	Clostridiales	Christensenellaceae	Christensenella	0.000954126	0.000143699	0.000292203	0.00152476	0	0	0.0030539	0	0.00555185	0	0	0	0	0	0	0.00313903	0	0	0	0	0	0.0128896	0	0	0	0	0	0	0	0	0	0	0	0	0	0	0	0	0	0	0	0
62	ASV17470	Bacteria	Firmicutes	Clostridia	Clostridiales	Peptococcaceae	Dehalobacterium	0.00136452	0.00133785	0.000727001	0.00143896	0	0	0	0	0.00277593	0.00285592	0.0050746	0	0.00534259	0	0.00258164	0	0	0	0	0	0.0059625	0	0	0	0	0	0	0	0	0	0	0	0	0	0.0165103	0	0	0	0	0	0.010395	0
63	ASV175	Bacteria	Firmicutes	Erysipelotrichia	Erysipelotrichales	Erysipelotrichaceae	Erysipelotrichaceae_UCG-003	1.35976	0.725896	1.17457	0.581901	0.331328	1.9565	0.543594	1.04518	0.693982	0.245609	0.398356	0.418994	0.480833	1.69175	0.663483	3.4184	0.16721	1.02436	0.814871	0.149578	0.432281	9.63368	0	1.14142	2.46161	0.047886	2.99428	1.87115	0.74563	0.127124	0.957416	2.40701	1.50142	0	0.86679	0	0.847744	0.618889	1.06167	1.66708	2.20721	0.344252
64	ASV17559	Bacteria	Firmicutes	Clostridia	Clostridiales	Syntrophomonadaceae	Pelospora	0	0.000466114	0	0	0	0	0	0	0	0	0	0	0	0	0	0	0	0	0	0	0	0	0	0	0	0	0	0	0	0	0	0	0	0	0	0	0	0	0	0	0	0
65	ASV1757	Bacteria	Firmicutes	Clostridia	Clostridiales	Lachnospiraceae	Tyzzerella_4	0.0567986	0.536191	0	0.0572258	0	0	0	0	0	0	0	0	0	0	0	0.67803	0.184507	0	0	0	0	0	0	0	0	0	0	0	0	0	0	0	0	0.273434	0	0	0	0	0	10.4131	0	1.08729
66	ASV17651	Bacteria	Firmicutes	Clostridia	Clostridiales	Caldicoprobacteraceae	Caldicoprobacter	0	0.00100707	0.000279013	0	0.00530124	0	0	0	0	0	0	0	0	0	0	0	0	0	0	0	0	0	0	0	0	0	0	0	0	0	0	0	0	0	0	0	0	0	0	0	0	0
67	ASV17711	Bacteria	Actinobacteria	Actinobacteria	Bifidobacteriales	Bifidobacteriaceae	Neoscardovia	0	0.000416435	0	0	0	0	0	0	0	0	0	0	0	0	0	0	0	0	0	0	0	0	0	0	0	0	0	0	0	0	0	0	0	0	0	0	0	0	0	0	0	0
68	ASV17785	Bacteria	Firmicutes	Clostridia	Clostridiales	Lachnospiraceae	Parasporobacterium	0.00030539	0.000292594	0	0.000772117	0	0	0.0061078	0	0	0	0	0	0	0	0	0	0	0	0	0	0	0	0	0	0	0	0	0	0	0	0	0	0	0	0	0	0	0	0	0	0	0
69	ASV17849	Bacteria	Firmicutes	Clostridia	Clostridiales	Peptostreptococcaceae	Asaccharospora	0.000275171	0	0.000312067	0.00211779	0	0	0	0	0	0	0	0	0	0	0	0	0	0	0	0	0	0	0	0	0	0	0.00592926	0	0	0	0	0	0	0	0.00550343	0	0	0	0	0	0	0
70	ASV18210	Bacteria	Bacteroidetes	Bacteroidia	Bacteroidales	Muribaculaceae	CAG-873	0	0	0.000267084	0	0	0	0	0	0	0	0.0050746	0	0	0	0	0	0	0	0	0	0	0	0	0	0	0	0	0	0	0	0	0	0	0	0	0	0	0	0	0	0	0
71	ASV18771	Bacteria	Proteobacteria	Gammaproteobacteria	Enterobacteriales	Enterobacteriaceae	ATCC-39006	0.000854482	0.000273299	0	0	0	0	0	0	0	0	0	0	0	0	0	0	0	0	0	0	0	0	0	0	0	0	0	0	0	0	0	0	0	0.0170896	0	0	0	0	0	0	0	0
72	ASV18792	Bacteria	Bacteroidetes	Bacteroidia	Bacteroidales	Rikenellaceae	hoa5-07d05_gut_group	0.000284827	0	0	0	0	0	0	0	0	0	0	0	0	0	0	0	0	0	0	0	0	0	0	0	0	0	0	0	0	0	0	0	0	0.00569655	0	0	0	0	0	0	0	0
73	ASV18928	Bacteria	Firmicutes	Clostridia	Clostridiales	Lachnospiraceae	Cuneatibacter	0	0	0	0.000364737	0	0	0	0	0	0	0	0	0	0	0	0	0	0	0	0	0	0	0	0	0	0	0	0	0	0	0	0	0	0	0	0	0	0	0	0	0.00693001	0
74	ASV18958	Bacteria	Actinobacteria	Actinobacteria	Actinomycetales	Actinomycetaceae	Varibaculum	0.000254582	0	0	0.000358782	0	0	0	0	0	0	0	0	0	0	0	0	0	0	0	0	0	0	0	0	0	0	0	0	0	0	0	0	0	0	0	0	0	0	0	0	0	0.00681686
75	ASV18973	Bacteria	Firmicutes	Erysipelotrichia	Erysipelotrichales	Erysipelotrichaceae	Erysipelothrix	0	0.000289134	0	0	0	0	0	0	0	0	0	0	0	0	0	0	0	0	0	0	0	0	0	0	0	0	0	0	0	0	0	0	0	0	0	0	0	0	0	0	0	0
76	ASV1898	Bacteria	Firmicutes	Clostridia	Clostridiales	Ruminococcaceae	UBA1819	0.0816397	0.0616002	0.0262423	0.0620206	0	0.022161	0.0152695	0	0	0.0114237	0.0888054	0.264093	0.0373982	0.076227	0.0851943	0.0502244	0.233517	0	0.0532444	0	0.00894374	0.193344	0	0.0109227	0.0473387	0	0.0355756	0	0.0152793	0.0200723	0	0.0735398	0.0308299	0.113931	0	0.0149768	0	0.127169	0.03292	0.129856	0.197505	0.712362
77	ASV19164	Bacteria	Bacteroidetes	Bacteroidia	Sphingobacteriales	Sphingobacteriaceae	Sphingobacterium	0	0.000303933	0	0	0	0	0	0	0	0	0	0	0	0	0	0	0	0	0	0	0	0	0	0	0	0	0	0	0	0	0	0	0	0	0	0	0	0	0	0	0	0
78	ASV19187	Bacteria	Firmicutes	Bacilli	Lactobacillales	Aerococcaceae	Facklamia	0	0.000310742	0	0	0	0	0	0	0	0	0	0	0	0	0	0	0	0	0	0	0	0	0	0	0	0	0	0	0	0	0	0	0	0	0	0	0	0	0	0	0	0
79	ASV19294	Bacteria	Firmicutes	Erysipelotrichia	Erysipelotrichales	Erysipelotrichaceae	Erysipelotrichaceae_UCG-008	0	0.000251934	0	0	0	0	0	0	0	0	0	0	0	0	0	0	0	0	0	0	0	0	0	0	0	0	0	0	0	0	0	0	0	0	0	0	0	0	0	0	0	0
80	ASV19370	Bacteria	Actinobacteria	Coriobacteriia	Coriobacteriales	Eggerthellaceae	Paraeggerthella	0	0.000287398	0	0	0	0	0	0	0	0	0	0	0	0	0	0	0	0	0	0	0	0	0	0	0	0	0	0	0	0	0	0	0	0	0	0	0	0	0	0	0	0
81	ASV19473	Bacteria	Firmicutes	Clostridia	Clostridiales	Lachnospiraceae	44679	0	0	0	0.000839155	0	0	0	0	0	0	0	0	0	0	0	0	0	0	0	0	0	0	0	0	0	0	0	0	0	0	0	0	0	0	0	0	0	0	0	0	0	0
82	ASV19476	Bacteria	Firmicutes	Clostridia	Clostridiales	Ruminococcaceae	Harryflintia	0	0.000127691	0	0.000240168	0	0	0	0	0	0	0	0	0	0	0	0	0	0	0	0	0	0	0	0	0	0	0	0	0	0	0	0	0	0	0	0	0	0	0	0	0	0
83	ASV19713	Bacteria	Bacteroidetes	Bacteroidia	Bacteroidales	Bacteroidales_Incertae_Sedis	Phocaeicola	0	0.000273299	0	0	0	0	0	0	0	0	0	0	0	0	0	0	0	0	0	0	0	0	0	0	0	0	0	0	0	0	0	0	0	0	0	0	0	0	0	0	0	0
84	ASV200	Bacteria	Bacteroidetes	Bacteroidia	Bacteroidales	Prevotellaceae	Prevotella_9	1.69787	3.03706	6.64144	9.55288	0	0	0	0	0	11.0581	15.1933	0	0.0160278	22.1206	0	0	0	0	0	0	13.3113	0	17.2637	0	0	8.54342	0	0	0	1.57902	0	0	0	0	22.8832	0	16.6784	0.101735	0	0	0	0.0920277
85	ASV201	Bacteria	Firmicutes	Clostridia	Clostridiales	Lachnospiraceae	Coprococcus_3	0.76002	0.618537	0.739166	0.622168	0.572534	0.544528	0.809284	0.749501	0.607928	0.733971	0.870293	0.997969	1.00975	0.885217	0.813218	1.62288	0.265229	0.864532	0.886636	1.39153	0.724443	0	0.765955	0.808279	0.352081	0.653503	1.05541	1.12024	1.03899	0.956778	0.343612	0.568519	0.869404	0.156655	0.847528	1.23109	0.906103	0.658452	0.384067	1.5653	0.893971	0.402195
86	ASV2015	Bacteria	Proteobacteria	Gammaproteobacteria	Aeromonadales	Succinivibrionaceae	Succinivibrio	0	0	0.677703	0.757627	0	0	0	0	0	0	0	0	0	0	0	0	0	0	0	0	0	0	0	0	0	0	0	0	0	12.8764	0	0	0	0	0	0	0	0	0	0	0	0
87	ASV20279	Bacteria	Proteobacteria	Gammaproteobacteria	Betaproteobacteriales	Hydrogenophilaceae	Thiobacter	0	0.000266042	0	0	0	0	0	0	0	0	0	0	0	0	0	0	0	0	0	0	0	0	0	0	0	0	0	0	0	0	0	0	0	0	0	0	0	0	0	0	0	0
88	ASV2052	Bacteria	Actinobacteria	Coriobacteriia	Coriobacteriales	Eggerthellaceae	Senegalimassilia	0.0829063	0.0754903	0.169228	0.0972511	0.217351	0.807294	0	0	0.077726	0.0257033	0.0329849	0	0	0.11557	0	0.29193	0.239283	0	0.166678	0.349016	0.122231	0	0.145267	0.232107	0.109471	0.0845047	0	0	0.498105	0.220795	0.226138	0.0989959	0	0	0.137586	0	0	0.25999	0.20575	0.312357	0	0.21814
89	ASV2055	Bacteria	Bacteroidetes	Bacteroidia	Bacteroidales	Prevotellaceae	Prevotellaceae_NK3B31_group	0.423589	0.273723	0.539112	0.507384	0	0	0	4.6861	4.8773	0	0	0	0	0	0	3.78567	0	0	0	0	0	0	0	0	0	0	0	0	4.63574	0.0635622	0	0	0	0	0	0	0.666523	0	0	3.05689	0	0
90	ASV20705	Bacteria	Firmicutes	Bacilli	Lactobacillales	Leuconostocaceae	Fructobacillus	0	0	0.000154571	0	0	0	0	0	0	0	0	0	0	0	0	0	0	0	0	0	0	0	0	0	0	0	0	0	0	0	0.00293686	0	0	0	0	0	0	0	0	0	0	0
91	ASV20766	Bacteria	Proteobacteria	Gammaproteobacteria	Pasteurellales	Pasteurellaceae	Cricetibacter	0	0	0.00016166	0	0	0	0	0	0	0	0	0	0	0	0	0	0	0	0	0	0	0	0	0	0	0	0	0	0	0	0	0	0	0	0	0	0.00307154	0	0	0	0	0
92	ASV20829	Bacteria	Actinobacteria	Actinobacteria	Actinomycetales	Actinomycetaceae	Arcanobacterium	0	0	0	0.000358782	0	0	0	0	0	0	0	0	0	0	0	0	0	0	0	0	0	0	0	0	0	0	0	0	0	0	0	0	0	0	0	0	0	0	0	0	0	0.00681686
93	ASV2095	Bacteria	Firmicutes	Clostridia	Clostridiales	Lachnospiraceae	Marvinbryantia	0.116926	0.154817	0.320827	0.233392	0.220002	0.522367	0	0.130647	0.0943815	0.148508	0.0431341	0	0.208361	0.00737681	0.557635	0.0251122	0	0.01453	0.152788	0.0770556	0.184837	0.030935	1.28099	0	0.0502973	0.439424	0.127479	0.508756	0.244469	0.70922	0.179148	0.158393	0.0585769	0.452875	0.250406	0.0688932	0.417729	0.788447	0.200263	0.0105289	0.218295	0.86915
94	ASV20960	Bacteria	Proteobacteria	Gammaproteobacteria	Betaproteobacteriales	Burkholderiaceae	Paraherbaspirillum	0	0	0	0.000334445	0	0	0	0	0	0	0	0	0	0	0	0	0	0	0	0	0	0	0	0	0	0	0	0	0	0	0	0	0	0	0	0	0	0	0	0	0	0
95	ASV211	Bacteria	Firmicutes	Clostridia	Clostridiales	Lachnospiraceae	Dorea	1.1314	1.08611	1.30133	1.06555	1.31471	2.42821	0.739044	0.794197	0.854986	0.505498	0.784025	0.769426	1.31695	1.75076	1.50768	1.18655	1.29732	2.11895	1.91217	1.20796	0.772143	0.327396	1.48569	1.21788	1.60952	1.63657	1.19475	0.990608	1.03594	1.12405	0.731278	1.33503	0.659761	0.803213	0.608129	1.47671	1.21326	3.21879	1.12751	2.70242	1.51421	1.54743
96	ASV212	Bacteria	Firmicutes	Clostridia	Clostridiales	Lachnospiraceae	Lachnospiraceae_ND3007_group	0.686008	0.711816	0.905291	0.855941	0.633499	2.27942	1.14521	0.508836	0.7495	0.0628302	0.591191	0	0.619741	0.511459	0.929392	1.18969	0	1.05342	0.472255	0.815883	1.05238	0	0.455611	1.79405	2.36989	0.35492	0.916071	1.25477	1.09705	1.33146	1.59178	1.58959	0.847823	0.179441	0.421012	0	1.17026	0.0876053	1.13025	1.11957	0.710326	0
97	ASV21270	Bacteria	Firmicutes	Clostridia	Clostridiales	Heliobacteriaceae	Heliorestis	0	0	0	0.000135873	0	0	0	0	0	0	0	0	0	0	0	0	0	0	0	0	0	0	0	0	0	0	0	0	0	0	0	0	0	0	0	0	0	0	0	0	0	0
98	ASV2185	Bacteria	Bacteroidetes	Bacteroidia	Bacteroidales	Barnesiellaceae	Coprobacter	0.141751	0.186186	0.101918	0.226998	0.0874705	0.00949758	0.189342	0.120333	0.0249833	0.15422	0.220745	0.393601	0.0774676	0.199174	0.304634	0.00941708	0.233517	0.0169516	0.141214	0.0385278	0.196762	0.139208	0	0.341334	0.00295867	0.0281682	0.0652219	0.124743	0.183352	0	0.0352423	0.367699	0.237391	0	0.0137586	0.0778793	0	0.144125	0.04938	0.445724	0.128205	0.800982
99	ASV2223	Bacteria	Firmicutes	Clostridia	Clostridiales	Peptostreptococcaceae	Terrisporobacter	0.055994	0.0491369	0.109328	0.0390261	0.159037	0.234274	0	0	0.274817	0	0	0	0.291171	0.179502	0.828708	0	0	0	0	0	0.414393	0	0	0	0	0	0	0	0.021391	0	0.217327	0	0	0	0	0	0	0.576499	0	0	0	0
100	ASV2241	Bacteria	Firmicutes	Negativicutes	Selenomonadales	Acidaminococcaceae	Acidaminococcus	0.214242	0.144854	0.0658806	0.0856172	0	0	0	0.670426	0	0	0.266416	0	0	0	0	0	0.0720731	0	3.33819	0	0	0	0.0660306	0	0.204148	0	0	0	0.137514	0.394754	0	0	0	0	0	0	0	0	0	0	0	0
101	ASV2251	Bacteria	Proteobacteria	Gammaproteobacteria	Pasteurellales	Pasteurellaceae	Haemophilus	0.0235389	0.035808	0.0469823	0.111306	0.0715668	0	0	0	0	0.0428388	0	0	0	0.34671	0	0	0.103785	0.184046	0.0277797	0	0	0	0	0.00819202	0	0	0	0	0.0672289	0	0.243759	0	0.163399	0	0	0	0	0	0	0	0	0
102	ASV2293	Bacteria	Bacteroidetes	Bacteroidia	Bacteroidales	Prevotellaceae	Paraprevotella	0.119534	0.140154	0.620708	0.57826	0.612294	0.892772	0.0061078	0	0	0	1.47924	0	0	0	0	0.477132	0	0	0	0	0.882449	0	0.257519	0	0.680494	0.647869	0	0.643283	0.74563	0.194032	1.84141	1.92618	0	0	0.167854	0	0.985963	0.110213	0.392297	0.568561	0	0.184055
103	ASV2321	Bacteria	Bacteroidetes	Bacteroidia	Bacteroidales	Marinifilaceae	Butyricimonas	0.286234	0.460852	0.260736	0.387103	0.320725	0.0506537	0.0488624	0.085952	0.430269	0.34271	0.169999	0.485018	0.331241	0.481951	0.36143	0.298208	0.25658	0.0435899	0.106489	0.258363	0.515756	0.190766	0.425897	0.682668	0.381668	0.11549	0.423942	0.0831621	0.158905	0.117088	0.384728	0.243247	0.462449	0	0.264164	0	0	0.53411	0.430703	0.628224	0.47124	0.52149
104	ASV2410	Bacteria	Proteobacteria	Deltaproteobacteria	Desulfovibrionales	Desulfovibrionaceae	Desulfovibrio	0.123145	0.105663	0.204479	0.185197	0.546028	0	0	0	0	0	0	0	0.440764	0	0	0	0.155678	0.239744	0	0	0.0834749	0	0.343359	0.619863	0.704163	0.526746	0.0711512	0	0	1.04376	0.46696	0.175364	0	0	0.302688	0	0.0614307	0.308031	0.455393	0	0.0935551	0.371519
105	ASV2428	Bacteria	Proteobacteria	Gammaproteobacteria	Betaproteobacteriales	Burkholderiaceae	Parasutterella	0.335485	0.382471	0.127653	0.159358	0.135182	0	0.638265	0.629169	0.119365	0.0456947	0.0634325	0.312341	0.00534259	0	0.111011	0.0408074	0.190273	0.0653848	0.134269	0.231167	0.372656	0	0.0132061	1.01581	0	0.0619701	0.729299	0.0293513	0.0855641	0	0	0.0848536	0	0.905751	1.04015	0	0.669595	0.0395637	0	0.00701927	0.748441	0.0886192
106	ASV2438	Bacteria	Bacteroidetes	Bacteroidia	Bacteroidales	Prevotellaceae	Prevotella_7	0.170659	0.267529	0.0346642	0.0810678	0	0	0	0	0	0	0.190297	0	3.21624	0	0.185878	0	0	0	0	0	0	0	0.254218	0	0	0	0	0	0	0.214104	0	0	0	0	0	0	0	0	0.04115	0	0	0.293125
107	ASV257	Bacteria	Firmicutes	Clostridia	Clostridiales	Lachnospiraceae	Anaerostipes	1.03229	0.674012	0.857784	0.633576	1.047	2.39972	1.1727	0.873272	0.555185	1.00814	0.152238	0.266633	0.320556	0.270483	0.684136	1.71077	2.03823	2.46525	1.84272	0.206237	1.32964	0.592921	0.267424	0.557057	0.949732	0.194361	1.00501	0.589473	0.69368	0	0.581498	1.03521	1.88679	0.905751	0.908065	0.7099	0.906103	1.19539	1.133	0.705436	1.1192	0.93391
108	ASV2574	Bacteria	Firmicutes	Clostridia	Clostridiales	Ruminococcaceae	Intestinimonas	0.030557	0.0270596	0.0723102	0.145281	0.209399	0	0	0	0.0333111	0	0.0811935	0.114271	0	0	0	0.156951	0	0.0169516	0	0	0.07155	0	0.198092	0.256683	0.0207107	0.132391	0	0.139419	0	0.26763	0.061674	0.0480837	0	0.0455724	0	0	0	0.118691	0.274333	0	0	0.439688
109	ASV2582	Bacteria	Lentisphaerae	Lentisphaeria	Victivallales	Victivallaceae	Victivallis	0.0734515	0.0458212	0.0829428	0.0769809	0.273014	0	0	0	0.0805019	0.40554	0	0.0304723	0.0160278	0	0.0593778	0.0313903	0.147029	0	0	0.138247	0.0506812	0	0.23771	0.442369	0.0562147	0.0985888	0.186772	0	0.119179	0.13716	0	0	0.265138	0	0.0715445	0	0	0.127169	0.351147	0	0.294525	0
110	ASV2603	Bacteria	Bacteroidetes	Bacteroidia	Bacteroidales	Prevotellaceae	Prevotella_2	0.132376	0.097021	0.321244	0.358312	0	0	0	0	0	0	0	0	0	0	0	0	0	0	0	0	1.24914	2.64752	1.24468	0	0	0	0	0	0	0.572059	0	0	0	0	0	0	3.03775	0	0	0	0	0
111	ASV2621	Bacteria	Firmicutes	Clostridia	Clostridiales	Ruminococcaceae	Ruminiclostridium_9	0.241176	0.261067	0.1685	0.243937	0.124579	0.132966	0.12521	0.137523	0.274817	0.376981	0.104029	0.7161	0	0.199174	0.302052	0.32332	0.0864877	0.10171	0.150473	0.256096	0.110306	0.232013	0.115554	0.297643	0.139057	0.191544	0.453589	0.212797	0.388094	0.0602168	0.123348	0.138594	0.120237	0.375972	0.280675	0.398383	0.276438	0.175211	0.0877867	0.263223	0.907831	0
112	ASV2643	Bacteria	Tenericutes	Mollicutes	Anaeroplasmatales	Anaeroplasmataceae	Anaeroplasma	0.124742	0.0841863	0.112027	0.14796	0.795186	0	0	0	0	0	0	0	0	0	0	0	0	0	0	0	0	0	0	0	0	0	0	0	0	0	1.33333	0	0	0	0	0	0	0	0.392297	0	0	0
113	ASV2651	Bacteria	Firmicutes	Erysipelotrichia	Erysipelotrichales	Erysipelotrichaceae	Erysipelatoclostridium	0.13438	0.0779931	0.0883474	0.0272117	0.222652	0.319752	0.225989	0	0	0	0.0101492	0.00761808	0	0	0	0	0	0.0387465	0	0.213036	0	0.288727	0	0.232107	0.008876	0	0.0118585	0.25927	0	0	0	0.178193	0.00924898	0.450027	0.00275171	0.796765	0	0	0.21398	0.0912505	0.0623701	0.00681686
114	ASV2771	Bacteria	Firmicutes	Clostridia	Clostridiales	Ruminococcaceae	Negativibacillus	0.100559	0.118239	0.069829	0.107634	0	0.0316586	0.0366468	0.0618854	0	0	0.182685	0.180295	0.138907	0.0958985	0.180715	0.0627806	0.109551	0	0.175938	0	0	0.23459	0.0693321	0	0	0.109856	0.263852	0.0562567	0.0916758	0.13716	0	0	0.015415	0.264889	0.32195	0	0.11979	0.141299	0	0.182501	0.533611	0.269266
115	ASV285	Bacteria	Bacteroidetes	Bacteroidia	Bacteroidales	Tannerellaceae	Parabacteroides	1.3438	2.22815	1.13012	1.54917	0.622896	0.462215	1.86593	1.56089	1.02154	0.394117	1.43357	0.700863	1.70696	1.48274	1.82264	0.791035	1.62309	0.745871	2.22469	0.734294	2.00638	0.659947	1.62765	1.38172	1.89946	1.41968	1.90329	0.97104	1.38736	0.645658	0.651982	1.64333	0.48403	1.73745	1.82439	1.34192	1.18561	1.26039	0.56787	2.34093	1.52114	2.07233
116	ASV3014	Bacteria	Firmicutes	Clostridia	Clostridiales	Lachnospiraceae	Lachnospiraceae_UCG-003	0.0113317	0.0253904	0.15244	0.086365	0.251809	0	0	0	0.0444148	0	0	0	0	0	0	0	0	0	0	0.226634	0	0	0	0	0	0	0	0.459838	0.430876	0	1.60352	0	0	0	0	0	0	0	0.27982	0	0	0
117	ASV3015	Bacteria	Firmicutes	Clostridia	Clostridiales	Ruminococcaceae	Ruminococcaceae_UCG-010	0.212818	0.20646	0.450041	0.383351	1.20868	0.0348245	0.183234	0.189094	0.92716	0.12566	0.454176	0.0406298	0.480833	0	0.593778	0	0.449736	0	0	0.496329	1.01064	0.363486	0.316947	0.611671	0	0.0760542	0.317216	0.401135	0.822027	1.29466	0.10279	0.00565691	0.0955728	0.0227862	0.423764	0	0.454587	1.02866	0.833973	0	0.426195	0.449913
118	ASV3019	Bacteria	Firmicutes	Clostridia	Clostridiales	Ruminococcaceae	Flavonifractor	0.145963	0.128965	0.0324451	0.079532	0.0450606	0.0474879	0.0794014	0	0	0	0	0.609446	0	0	0.0567962	0	0	0	0.340301	0.122382	0	0.273259	0.062729	0.12288	0.239652	0.0394355	0.0355756	0.141865	0	0.0434899	0	0.192335	0	0.338944	0.126579	0.164745	0	0.00847793	0	0	0.28413	0.0715771
119	ASV31	Bacteria	Bacteroidetes	Bacteroidia	Bacteroidales	Bacteroidaceae	Bacteroides	21.1069	23.9929	12.5943	17.636	19.983	15.1233	24.3335	14.9419	13.5937	7.97087	10.1568	25.3301	17.6306	12.4029	12.1879	22.4817	14.9451	16.9952	37.2966	17.1018	11.293	29.2181	7.5605	20.3736	36.6165	8.29554	13.4446	11.2269	17.9318	2.20795	23.7709	26.5677	20.4772	23.7005	10.1511	24.7417	8.95046	6.2115	23.6091	20.3173	13.7283	10.6786
120	ASV310	Bacteria	Firmicutes	Clostridia	Clostridiales	Ruminococcaceae	Ruminococcus_2	5.18383	2.38941	2.63891	1.33135	0.914464	7.4461	6.21164	6.2023	0	0	9.30427	17.5825	20.1042	0	6.89815	0	4.36763	8.06413	0	13.4711	1.57112	5.95241	0.0594275	3.31504	0.0147933	3.6675	12.4811	0	2.78389	0.103707	0.381791	2.86522	2.5558	5.17531	2.5701	3.74719	6.00485	0	2.469	0	6.63202	0
121	ASV3158	Bacteria	Actinobacteria	Coriobacteriia	Coriobacteriales	Eggerthellaceae	Slackia	0.0517487	0.046811	0.109331	0.0495681	0.331328	0	0	0	0.216522	0.0485506	0.0456714	0.111732	0	0.0491787	0.0387247	0.273095	0.129732	0.314816	0	0	0	0	0.0330153	0	0	0.183093	0.275711	0	0	0.394754	0	0.161222	0	0	0.118324	0	0	0.180862	0.203007	0.0526445	0.162855	0
122	ASV3290	Bacteria	Firmicutes	Erysipelotrichia	Erysipelotrichales	Erysipelotrichaceae	Merdibacter	0.0461907	0.0462218	0.0235949	0.0472208	0	0	0.308444	0.154714	0	0	0	0	0.0106852	0	0.0335614	0.00941708	0	0.00726498	0	0.00679902	0	0	0.0396183	0	0	0.0140841	0.296463	0.00733783	0	0	0.0293686	0	0	0.187986	0.162351	0.0359443	0.0614307	0	0	0.0561541	0.467775	0
123	ASV341	Bacteria	Firmicutes	Clostridia	Clostridiales	Lachnospiraceae	Roseburia	1.72934	1.83032	1.78228	1.70568	1.7176	0.838953	3.60055	2.33789	0	0.756819	3.46341	0.576435	0.603713	3.13268	1.24177	2.23499	0.302707	3.4218	2.48397	1.18983	0.4293	2.90789	1.43616	0.764589	1.2456	2.49289	1.03169	2.97671	1.83963	3.08109	1.48899	4.18611	1.52917	0.253496	1.03464	1.07833	2.28215	0	2.38121	0	0.790021	0
124	ASV359	Bacteria	Firmicutes	Clostridia	Clostridiales	Lachnospiraceae	Lachnospiraceae_NK4A136_group	0.711675	0.726568	1.09303	0.964796	1.13712	0.139298	4.29989	0.385065	0.582945	1.58789	2.12372	0.972575	0.248431	1.53929	0.196205	0	0	0.280912	0	0.713897	0.327937	0.711505	1.40975	0.286721	2.13912	0.909834	0.157125	0.503865	1.03594	0.943396	2.31131	4.66129	0.776915	0.321855	1.91244	0	1.86749	0.257164	0.507517	0	0	0.023859
125	ASV363	Bacteria	Firmicutes	Clostridia	Clostridiales	Ruminococcaceae	Ruminococcaceae_UCG-013	0.429354	0.285402	0.43279	0.314903	0.100724	0.376737	0.482516	0.543217	0.532978	0.325575	0.324774	0.391061	0.365968	0.418019	0.317542	0	0.0663073	0.922652	0.743107	0.704832	0.736368	0.515584	0.0792367	0.483329	0.73375	0.929551	0.726335	0.254378	0.476714	1.07721	0.593245	0.707114	0.262055	0.187986	0.264164	0.425341	0.187364	0.0226078	0.117963	0	0.734581	0
126	ASV3654	Bacteria	Actinobacteria	Coriobacteriia	Coriobacteriales	Eggerthellaceae	Adlercreutzia	0.0654897	0.042956	0.046972	0.0232677	0	0.31342	0.0335929	0.165028	0	0	0	0.0482478	0.200347	0	0	0	0	0.123505	0	0.108784	0	0.232013	0	0	0	0	0.278675	0.105176	0	0	0	0	0	0.113931	0.159599	0	0.0737169	0	0	0	0.11088	0
127	ASV3669	Bacteria	Firmicutes	Clostridia	Clostridiales	Lachnospiraceae	GCA-900066575	0.0565392	0.0342439	0.0369758	0.0370903	0.121929	0.126634	0	0	0	0	0.0202984	0.220924	0.0641111	0.108193	0.0180715	0.175786	0	0	0	0	0.07155	0.0515584	0	0.0901122	0	0	0	0.112513	0	0	0	0.141423	0	0.162352	0.115572	0	0	0	0	0.066683	0.21483	0
128	ASV3731	Bacteria	Firmicutes	Clostridia	Clostridiales	Lachnospiraceae	Lachnospiraceae_UCG-002	0.0130615	0.00643708	0.0174574	0.00218836	0	0	0	0	0	0	0	0	0	0	0	0	0	0	0	0	0	0	0	0	0	0	0	0	0	0	0.211454	0	0.120237	0	0	0	0	0	0	0	0	0
129	ASV3779	Bacteria	Fusobacteria	Fusobacteriia	Fusobacteriales	Fusobacteriaceae	Fusobacterium	0.0140112	0.483839	0.00207068	0	0	0	0	0	0	0	0	0.0558659	0	0.039343	0	0	0.0259463	0	0	0	0	0	0	0.0546135	0	0	0	0	0	0	0	0	0	0	0	0	0	0	0	0.0280771	0	0
130	ASV3856	Bacteria	Firmicutes	Clostridia	Clostridiales	Lachnospiraceae	Howardella	0.013838	0.00444198	0.0525348	0.0367323	0.182893	0	0	0	0	0	0	0	0	0	0	0	0.276761	0	0	0	0.113287	0	0.171679	0	0	0.129574	0	0	0	0.167269	0.140969	0	0.0924898	0	0	0	0	0	0.175573	0	0	0
131	ASV391	Bacteria	Firmicutes	Clostridia	Clostridiales	Lachnospiraceae	Lachnoclostridium	0.715407	0.856433	0.7367	1.05595	0.357834	0.284927	0.455031	0.292237	0.244282	0.414108	1.35492	1.27476	0.488847	0.907347	0.472441	1.43767	0.2364	0.721654	1.78716	0.285559	0.763199	0.26037	0.442405	0.630786	1.87284	0.614067	0.776734	0.604148	0.534776	0.786164	0.558003	1.67444	1.31027	0.159503	0.434771	1.69238	0.764812	0.0791273	0.669373	1.10553	0.973666	0.330618
132	ASV3989	Bacteria	Firmicutes	Clostridia	Clostridiales	Ruminococcaceae	Oscillospira	0.0789856	0.108028	0.0290299	0.0694656	0	0.044322	0	0.158152	0	0	0.0456714	0.0304723	0	0	0.307216	0.0251122	0	0	0.136584	0.0883873	0	0	0.0198092	0	0.0769254	0.047886	0	0	0.0672289	0	0	0.0876821	0	0	0.27242	0.08387	0	0.2176	0	0	0	0.221548
133	ASV4085	Bacteria	Firmicutes	Clostridia	Clostridiales	Ruminococcaceae	Ruminococcaceae_UCG-008	0.0165649	0.0135645	0.0117075	0.0265401	0.00265062	0	0	0	0	0	0	0	0	0	0.170389	0	0	0	0	0.16091	0	0	0	0	0	0	0	0	0.216966	0	0	0	0	0	0	0	0	0.00282598	0	0	0	0
134	ASV4086	Bacteria	Firmicutes	Clostridia	Clostridiales	Lachnospiraceae	Anaerosporobacter	0.035776	0.0326133	0.00475429	0	0	0	0.134372	0	0	0	0	0	0	0	0.167807	0	0	0.222793	0	0	0	0	0	0	0	0	0	0	0	0	0	0	0	0	0	0	0	0	0	0	0	0
135	ASV4149	Bacteria	Firmicutes	Erysipelotrichia	Erysipelotrichales	Erysipelotrichaceae	Coprobacillus	0.0194077	0.00465157	0.00104115	0.0274469	0	0	0	0	0	0	0	0	0	0	0	0.22601	0	0	0	0	0	0	0	0	0	0	0	0	0	0	0	0	0	0	0	0	0	0.0197818	0	0	0	0.52149
136	ASV416	Bacteria	Firmicutes	Clostridia	Clostridiales	Lachnospiraceae	Lachnospira	1.9427	1.59134	2.22181	2.10407	0.861452	3.23867	2.90121	2.56481	8.43327	0.885335	1.87506	1.39665	1.68292	1.64257	2.44998	4.80271	1.45299	2.19645	1.2362	1.93545	0.852637	0	0.538149	2.42757	2.14208	2.0422	0	1.74885	1.15206	3.60297	4.81351	1.13987	4.64299	0.0911447	0.709942	1.44676	1.78456	3.26683	1.16592	1.85309	0	1.9803
137	ASV4187	Bacteria	Firmicutes	Bacilli	Lactobacillales	Lactobacillaceae	Lactobacillus	0.0181072	0.068562	0.0378457	0.151333	0	0.335581	0.0213773	0.237228	0	0	0	0	0	0.00983574	0	0	0	0.0266383	0.00231498	0	0.0178875	0	0	0	0	0.0619701	0	0	0	0	0.114537	0	0	0.00854482	0.0660411	0	0.0829315	0.0734754	0	0	0	0
138	ASV424	Bacteria	Firmicutes	Clostridia	Clostridiales	Clostridiaceae_1	Clostridium_sensu_stricto_1	0.636747	0.529804	2.65333	0.358703	1.9058	0.816792	0.161857	0.959224	0.52465	0.971012	0.44149	0	2.39615	0.36884	2.5042	0.232288	0.224868	0.0726498	0.291687	1.76321	1.74403	0.0128896	0.439103	0.278529	0	0.23943	0.0948682	0.105176	1.25596	1.49204	0	0	0.32988	0.125324	0.696183	0	0.135148	2.5999	1.31131	0.238655	0.533611	1.05321
139	ASV4303	Bacteria	Firmicutes	Clostridia	Clostridiales	Family_XIII	Family_XIII_AD3011_group	0.0686218	0.0692966	0.162033	0.079432	0.196146	0.218444	0.0213773	0.0343808	0.0277593	0.0199914	0.0685071	0.063484	0.0934954	0.0860628	0	0.106727	0.037478	0	0.0162048	0.208503	0.1908	0.0850713	0.0660306	0.226646	0.0147933	0.205628	0.305357	0.0562567	0.0305586	0.237522	0.0352423	0.118795	0	0.031331	0.132082	0	0.0276438	1.04279	0.05761	0.126347	0.19404	0.637377
140	ASV4304	Bacteria	Firmicutes	Clostridia	Clostridiales	Ruminococcaceae	Hydrogenoanaerobacterium	0.00359547	0.00337405	0.0217211	0.0293412	0.0265062	0	0	0	0	0	0.0177611	0	0	0	0.0258164	0	0	0	0	0.00906536	0.0059625	0	0	0	0	0	0	0.0171216	0	0.0401445	0	0	0	0.0370275	0	0	0	0.305205	0	0	0.10395	0.221548
141	ASV4351	Bacteria	Firmicutes	Clostridia	Clostridiales	Peptococcaceae	Peptococcus	0.0382682	0.0267531	0.0331817	0.0279482	0.108675	0	0	0	0	0.0999572	0	0.2387	0	0.120488	0.167807	0.00627806	0	0	0	0	0	0	0	0	0.071008	0	0	0	0	0	0	0	0	0	0.181613	0	0	0.401289	0	0	0	0.351069
142	ASV4394	Bacteria	Firmicutes	Clostridia	Clostridiales	Lachnospiraceae	Tyzzerella_3	0.0351627	0.0255053	0.0418005	0.0195912	0	0	0	0	0	0	0	0.124429	0	0	0	0	0	0	0.206033	0	0.208687	0	0	0	0.372792	0	0.0622573	0	0	0	0	0.523264	0	0	0	0	0	0	0	0	0	0
143	ASV4414	Bacteria	Bacteroidetes	Bacteroidia	Bacteroidales	Prevotellaceae	Prevotella	0.0281544	0.0146907	0.00235454	0.0689067	0	0	0	0	0	0	0	0.111732	0.00534259	0	0	0.141256	0	0	0	0	0	0	0	0	0	0	0	0	0	0.0200723	0	0	0.024664	0.170896	0	0	0	0	0	0.115818	0	0.787348
144	ASV4429	Bacteria	Actinobacteria	Coriobacteriia	Coriobacteriales	Atopobiaceae	Olsenella	0.0557685	0.0228003	0.0494341	0.036986	0	0	0.146587	0.144399	0	0	0.0279103	0.175216	0	0	0.0490512	0	0.294058	0.0387465	0	0	0	0	0	0	0	0.385905	0	0.0782702	0	0.240867	0	0	0	0	0	0	0	0.206296	0	0	0	0.0204506
145	ASV4476	Bacteria	Firmicutes	Clostridia	Clostridiales	Ruminococcaceae	Ruminiclostridium_1	0.00398758	0.0248809	0.0232948	0.0272697	0	0	0	0	0	0	0	0	0	0	0	0	0	0	0	0	0	0	0	0	0	0	0.0978329	0	0	0	0	0	0	0.0797516	0	0	0	0.344769	0	0	0.211365	0.306759
146	ASV4570	Bacteria	Firmicutes	Negativicutes	Selenomonadales	Veillonellaceae	Megasphaera	0.021077	0.0633503	0.119684	0.146219	0.177592	0	0	0	0	0	0.494773	0	0	0	0	0	0	0	0	0.421539	0	0	0	0	0	0	0.400225	0	0	0	0	0	0	0	0	0	0	0	0.227697	0	0.887041	0.00681686
147	ASV4594	Bacteria	Firmicutes	Clostridia	Clostridiales	Lachnospiraceae	Sellimonas	0.020893	0.0249027	0.00780166	0.0191943	0	0	0	0	0	0	0	0	0	0	0.123919	0	0	0	0	0	0	0.154675	0	0	0	0	0.148232	0	0	0	0	0	0	0	0.0220137	0	0	0	0	0	0.336105	0
148	ASV4605	Bacteria	Firmicutes	Bacilli	Lactobacillales	Enterococcaceae	Enterococcus	0.0210821	0.0304159	0.00157979	0.0048077	0	0	0	0	0	0	0	0	0	0	0	0	0.18739	0	0	0	0.02385	0	0	0	0	0	0	0	0	0	0	0	0.00616599	0	0.170606	0	0	0	0	0.154424	0	0
149	ASV4617	Bacteria	Firmicutes	Clostridia	Clostridiales	Lachnospiraceae	Butyrivibrio	0	0	0.00955239	0.0239194	0.153736	0	0	0	0.0277593	0	0	0	0	0	0	0	0	0	0	0	0	0	0	0	0	0	0	0	0	0	0	0	0	0	0	0	0	0	0.0795567	0	0	0
150	ASV4697	Bacteria	Synergistetes	Synergistia	Synergistales	Synergistaceae	Cloacibacillus	0	0	0.0550894	0.0733273	0	0	0	0	0	0	0	0	0	0	0	0	0	0	0	0	0	0	0	0	0	0	0.174913	0.0171216	0	0	0.0323054	0	0	0	0	0	0	0.822359	0	0	0.128205	1.08047
151	ASV470	Bacteria	Bacteroidetes	Bacteroidia	Bacteroidales	Marinifilaceae	Odoribacter	0.395312	0.677229	0.546181	0.61209	0.490365	0.272264	0.48557	0	0.31368	0.245609	0.190297	0.231082	0.518232	1.18029	0.260746	0.326459	0.544873	0.111396	0.226868	0.387544	0.685687	0.523317	1.59464	0.707244	0.618361	0.245064	0.610714	0.631054	0.326977	0.163923	0.546256	0.342243	0.0924898	0.635165	0.376985	0.608058	1.07504	1.61646	0.449907	0.894957	1.0499	1.72808
152	ASV4730	Bacteria	Firmicutes	Clostridia	Clostridiales	Family_XIII	Family_XIII_UCG-001	0.0330426	0.0192477	0.0375598	0.0252802	0.021205	0	0.0366468	0	0.0166556	0.0428388	0	0.099035	0.0641111	0	0.131664	0.0156951	0	0.00484332	0	0.09292	0.113287	0	0	0.0191147	0	0.0450692	0.0622573	0.0489189	0.0763965	0.0568714	0	0.152737	0	0.0398758	0.0853031	0	0.101361	0.0141299	0	0	0.0623701	0.0102253
153	ASV4738	Bacteria	Firmicutes	Negativicutes	Selenomonadales	Veillonellaceae	Veillonella	0.0286475	0.0556365	0.0469779	0.0857833	0.0530124	0	0	0	0.111037	0	0	0.0380904	0.00534259	0.226222	0	0.0502244	0	0	0	0.00453268	0.0953999	0	0	0	0	0.0676037	0	0.0489189	0	0	0.0851689	0	0.138735	0.0797516	0	0.0599071	0	0	0.0795567	0	0	0
154	ASV4757	Bacteria	Firmicutes	Clostridia	Clostridiales	Ruminococcaceae	Pseudoflavonifractor	0.00151166	0.00358798	0.0293797	0.0308076	0.0583137	0	0	0	0	0	0	0	0	0	0	0	0.0172975	0	0.00694493	0	0	0	0	0	0	0	0	0	0.0336145	0	0	0	0	0	0	0.00599071	0	0.466286	0	0	0.0970201	0.34766
155	ASV4801	Bacteria	Bacteroidetes	Bacteroidia	Bacteroidales	Rikenellaceae	Rikenellaceae_RC9_gut_group	0	0	0.114019	0.199433	0	0	0	0	0	0	0	0	0	0	0	0	0	0	0	0	0	0	0	0	0	0.298583	0	0	0	1.58236	0	0	0	0	0	0	0	0.285424	0	0	0	0.398787
156	ASV4864	Bacteria	Firmicutes	Clostridia	Clostridiales	Family_XI	Ezakiella	0.0129777	0.0408476	0.00172439	0.0493402	0.0106025	0.022161	0	0	0	0	0	0	0	0	0	0	0.00576585	0	0	0	0	0	0	0	0.0118347	0	0	0	0	0	0	0	0	0.0569655	0	0	0	0	0.0274333	0.372021	0	0.889601
157	ASV5012	Bacteria	Firmicutes	Clostridia	Clostridiales	Ruminococcaceae	Fastidiosipila	0	0.000701927	0	0.0186567	0	0	0	0	0	0	0	0	0	0	0	0	0	0	0	0	0	0	0	0	0	0	0	0	0	0	0	0	0	0	0	0	0	0	0	0.0140385	0	0.354477
158	ASV5037	Bacteria	Actinobacteria	Coriobacteriia	Coriobacteriales	Eggerthellaceae	Eggerthella	0.0286655	0.0300284	0.0113802	0.0061094	0	0.0158293	0	0	0	0	0	0	0	0	0	0	0	0	0	0	0	0	0	0	0	0	0	0	0	0	0	0	0.200395	0.190834	0	0.0149768	0	0	0	0	0.0589051	0
159	ASV507	Bacteria	Firmicutes	Clostridia	Clostridiales	Lachnospiraceae	Coprococcus_2	0.928187	0.770828	1.46562	0.918121	1.43134	1.39614	2.0339	3.76814	0	0.793945	0	0.667852	1.81648	0.511459	2.66684	0	0.219102	0.532765	0	1.04932	0.974868	0	0	4.05505	0	3.65905	0	3.57597	2.39885	2.89375	6.52863	0	0.262055	0	0.960348	0	2.34665	1.39321	2.37847	0	0	0.432871
160	ASV5116	Bacteria	Firmicutes	Clostridia	Clostridiales	Ruminococcaceae	Pygmaiobacter	0.0467593	0.0298911	0.0117821	0.0265489	0	0	0	0	0	0	0.0405968	0.114271	0.0427408	0	0.0593778	0	0.0345951	0	0	0	0	0.314506	0	0	0.0118347	0	0.171949	0	0	0	0	0.0113138	0	0.304765	0	0	0	0	0.0521233	0.115818	0.4158	0
161	ASV5176	Bacteria	Bacteroidetes	Bacteroidia	Bacteroidales	Prevotellaceae	Alloprevotella	0	0	0.0557999	0.10697	0.108675	0	0	0	0	0	0	0	0	0	0	0	0	0	0	0	0	0	0	0	0	0	0	0	0	0.886525	0	0	0	0	0	0	0	0.0649975	0.12345	0	0	0
162	ASV52	Bacteria	Firmicutes	Clostridia	Clostridiales	Lachnospiraceae	Blautia	4.97458	5.34677	4.62441	4.29015	2.17351	8.54782	4.4251	3.26274	3.44215	5.08639	1.58581	3.30371	3.06131	2.88925	2.98696	9.05923	3.56329	9.07154	5.58141	3.29073	2.55195	2.21959	4.5264	5.02717	6.56232	3.57455	7.10919	5.21475	2.84195	3.09782	2.96035	5.58337	3.61327	2.891	2.79574	6.57481	4.78545	3.53247	2.94908	7.69312	5.04851	2.25297
163	ASV5203	Bacteria	Actinobacteria	Coriobacteriia	Coriobacteriales	Eggerthellaceae	Enterorhabdus	0.00327681	0.00395509	0.044922	0.0219845	0	0.237439	0	0	0	0	0	0	0	0	0	0	0	0	0	0	0.0834749	0	0.0132061	0.0655362	0	0.0647869	0	0	0	0.324502	0	0.130109	0	0	0	0	0	0	0.0877867	0	0	0
164	ASV5207	Bacteria	Firmicutes	Erysipelotrichia	Erysipelotrichales	Erysipelotrichaceae	Dielma	0.00554769	0.00248885	0.013236	0.0203227	0.00795186	0	0	0	0	0	0	0	0	0	0	0	0.037478	0	0	0.00453268	0	0	0	0	0	0	0.219383	0	0	0	0	0	0.018498	0	0.00275171	0	0	0.00565195	0	0.0421156	0.336105	0
165	ASV5225	Bacteria	Firmicutes	Bacilli	Bacillales	Planococcaceae	Sporosarcina	0.013838	0	0	0	0	0	0	0	0	0	0	0	0	0	0	0	0.276761	0	0	0	0	0	0	0	0	0	0	0	0	0	0	0	0	0	0	0	0	0	0	0	0	0
166	ASV5230	Bacteria	Bacteroidetes	Bacteroidia	Bacteroidales	Marinifilaceae	Sanguibacteroides	0.00568882	0.0174571	0.0180138	0.0314147	0	0	0.0244312	0	0	0	0.12179	0	0	0	0	0	0.0605414	0	0	0	0	0	0.0726336	0	0	0.047886	0	0	0	0.0970159	0.00293686	0	0	0	0	0	0	0	0	0	0	0
167	ASV5301	Bacteria	Firmicutes	Negativicutes	Selenomonadales	Veillonellaceae	Allisonella	0.00262695	0.00583219	0.0372023	0.0419517	0	0	0	0	0	0.0399829	0.0405968	0	0	0.159831	0	0.0125561	0	0	0	0	0.0775124	0	0.161775	0	0	0	0	0	0.0305586	0.0133815	0	0	0	0	0	0	0	0	0	0	0	0
168	ASV5374	Bacteria	Firmicutes	Erysipelotrichia	Erysipelotrichales	Erysipelotrichaceae	Erysipelotrichaceae_UCG-006	0	0	0.0160226	0.0114359	0	0	0	0	0	0	0	0	0	0	0	0	0	0	0	0	0	0	0	0	0	0	0	0	0	0.304429	0	0	0	0	0	0	0	0	0	0	0	0
169	ASV539	Bacteria	Firmicutes	Clostridia	Clostridiales	Christensenellaceae	Christensenellaceae_R-7_group	1.22154	0.963141	2.35606	1.73749	3.51207	0.557191	0.143533	0.797635	3.83911	5.62616	2.23536	0.170137	2.58582	0.806531	2.2925	0.448881	2.10453	0.0121083	0.118064	2.26861	2.88883	0.0953829	1.99742	3.77652	0.109471	2.01966	1.38448	5.49115	1.69295	3.96093	3.87078	0.452553	2.07794	0.153807	1.19424	0	1.80299	5.70282	1.92308	0.7651	2.17602	3.84812
170	ASV547	Bacteria	Firmicutes	Negativicutes	Selenomonadales	Veillonellaceae	Dialister	0.674144	0.675947	0.696427	0.833507	2.21062	0	0	0	0.446924	2.48751	1.69999	0.540884	2.31334	1.32291	1.79166	0	0.498746	0.767666	2.7826	0	1.32666	0	0	0	1.34915	2.21684	0.996116	0.511202	0.611172	0.7962	0	0	0.496362	0.951323	0	0	0	0	1.54998	0.0877408	1.1781	0.388561
171	ASV5470	Bacteria	Bacteroidetes	Bacteroidia	Bacteroidales	Porphyromonadaceae	Porphyromonas	0.00443141	0.0083722	0.000309143	0.0667983	0	0	0	0	0	0	0	0	0	0	0	0.0156951	0.037478	0	0	0	0	0	0	0	0	0	0	0	0	0	0.00587372	0	0	0.0170896	0	0	0	0	0	0.129856	0	1.23044
172	ASV5481	Bacteria	Firmicutes	Negativicutes	Selenomonadales	Veillonellaceae	Mitsuokella	0	0	0.0731303	0.0757328	0	0	0	0	0	0	0.596265	0	0	0	0	0	0	0	0	0	0	0	0	0	0	0	0	0	0	0.401445	0	0	0	0	0	0	0	0	0	0	0	0
173	ASV5513	Bacteria	Bacteroidetes	Bacteroidia	Bacteroidales	Prevotellaceae	Prevotellaceae_UCG-003	0	0	0.00933184	0.0177665	0	0	0	0	0	0	0	0	0	0	0	0	0	0	0	0	0	0	0	0	0	0	0	0	0	0.177305	0	0	0	0	0	0	0	0	0	0	0	0
174	ASV5529	Bacteria	Actinobacteria	Coriobacteriia	Coriobacteriales	Coriobacteriaceae	Enorma	0.00514812	0.015988	0	0.000240168	0	0	0	0	0	0	0	0.0101574	0	0	0	0	0	0	0	0	0	0.092805	0	0	0	0	0	0	0	0	0	0	0	0	0	0	0	0	0	0	0	0
175	ASV5540	Bacteria	Firmicutes	Erysipelotrichia	Erysipelotrichales	Erysipelotrichaceae	Faecalitalea	0.0236759	0.0261331	0.0256855	0.0243704	0	0.0126634	0.061078	0	0	0	0	0	0.00534259	0	0	0	0.00864877	0	0	0	0.0178875	0	0	0.204801	0	0	0	0	0	0	0	0	0	0	0.0880548	0.0569118	0.264152	0.180862	0	0	0.03465	0.23859
176	ASV5643	Bacteria	Firmicutes	Clostridia	Clostridiales	Lachnospiraceae	Hungatella	0.0158257	0.0248933	0	0	0	0	0	0	0	0	0	0	0	0	0	0.188342	0	0	0	0	0	0	0	0	0	0	0	0	0	0	0	0	0	0.128172	0	0	0	0	0	0.396589	0	0
177	ASV5697	Bacteria	Firmicutes	Erysipelotrichia	Erysipelotrichales	Erysipelotrichaceae	Faecalicoccus	0.0102844	0.00804713	0	0.00969583	0	0	0	0	0	0	0	0.205688	0	0	0	0	0	0	0	0	0	0	0	0	0	0	0	0	0	0	0	0	0	0	0	0	0	0	0	0	0.0693001	0.0340843
178	ASV5738	Bacteria	Actinobacteria	Coriobacteriia	Coriobacteriales	Atopobiaceae	Libanicoccus	0	0	0.0206405	0.0051053	0	0	0	0	0	0	0	0	0	0	0	0	0	0	0	0	0	0	0	0	0	0	0	0	0	0.378028	0	0.0141423	0	0	0	0	0	0	0	0	0	0
179	ASV574	Bacteria	Firmicutes	Clostridia	Clostridiales	Lachnospiraceae	Coprococcus_1	0.25704	0.334009	0.306633	0.291026	0.233255	0.579352	0.455031	0.206285	0.322008	0.242753	0.114178	0	0.269801	0.0786859	0.240093	0.662335	0.129732	0.566668	0.407436	0.192639	0.327937	0	0.396183	0.387756	0	0.290133	0	0.276392	0.247525	0.341228	0.46696	0.545892	0.212727	0	0.211882	0	0.211936	0.480416	0.27159	0.652792	0	0.316984
180	ASV581	Bacteria	Firmicutes	Clostridia	Clostridiales	Ruminococcaceae	Butyricicoccus	0.436644	0.374752	0.312279	0.497551	0.437353	0.262766	0.467247	0.543217	0.158228	0.945309	0.238506	0.619604	0.216375	0.194256	0.167807	0.737671	0.170093	0.508548	1.51631	0.265162	0.545568	0.0979609	0.290535	0.677207	0.408296	0.211262	0.284605	0.210351	0.143625	0.759401	0.528634	0.681657	0.39154	0.367427	0.302688	0.272578	0.307154	0	0.30451	0	0.15246	0
181	ASV5860	Bacteria	Firmicutes	Clostridia	Clostridiales	Lachnospiraceae	Lachnospiraceae_NK3A20_group	0	0	0.0322213	0.0116401	0	0	0	0	0	0	0	0	0	0	0	0	0	0	0	0	0	0	0	0	0	0	0	0	0	0.612204	0	0	0	0	0	0	0	0	0	0	0	0
182	ASV5926	Bacteria	Firmicutes	Negativicutes	Selenomonadales	Acidaminococcaceae	Succiniclasticum	0	0.00105289	0.00845047	0.0234979	0	0	0	0	0	0	0	0	0	0	0	0	0	0	0	0	0	0	0	0	0	0.160559	0	0	0	0	0	0	0	0	0	0	0	0	0	0.0210578	0	0.0136337
183	ASV6004	Bacteria	Firmicutes	Erysipelotrichia	Erysipelotrichales	Erysipelotrichaceae	Catenisphaera	0.0136548	0.0443969	0.00815396	0.00670011	0	0	0	0	0	0	0	0	0	0	0	0.273095	0	0	0	0	0	0	0	0	0	0.154925	0	0	0	0	0	0	0	0	0	0	0	0	0	0.887937	0	0
184	ASV6021	Bacteria	Proteobacteria	Gammaproteobacteria	Enterobacteriales	Enterobacteriaceae	Klebsiella	0	0.0111317	0.00803172	0.0123745	0	0	0	0	0	0	0	0	0	0	0	0	0	0	0	0	0	0	0	0	0	0	0	0	0	0	0	0	0	0	0	0	0	0.152603	0	0	0	0
185	ASV6067	Bacteria	Firmicutes	Clostridia	Clostridiales	Family_XI	Peptoniphilus	0.00590752	0.00724657	0.000697532	0.0538174	0.0132531	0	0	0	0	0	0	0	0	0	0	0.0219732	0.0115317	0	0	0	0	0	0	0	0	0	0	0	0	0	0	0	0	0	0	0	0	0	0	0.133366	0	1.02253
186	ASV6069	Bacteria	Bacteroidetes	Bacteroidia	Bacteroidales	Prevotellaceae	Prevotella_6	0.00325466	0.00195135	0	0.0420205	0	0	0	0	0	0	0	0.0228542	0	0	0	0	0	0	0.00462995	0	0	0	0	0	0	0	0	0	0	0	0	0	0	0	0	0	0	0	0	0	0	0.719179
187	ASV6074	Bacteria	Firmicutes	Clostridia	Clostridiales	Ruminococcaceae	Ruminiclostridium	0.00275171	0.023158	0.000528217	0.00165388	0	0	0	0	0	0	0	0	0	0	0	0	0	0	0	0	0	0	0	0	0	0	0	0	0	0.0100361	0	0	0	0	0.0550343	0	0	0	0	0	0	0
188	ASV61	Bacteria	Firmicutes	Clostridia	Clostridiales	Ruminococcaceae	Subdoligranulum	3.39528	2.59653	2.82842	1.93693	3.60219	2.84294	4.58391	2.32758	3.03409	2.47894	2.45357	0.825292	3.27501	3.65398	4.01188	0.866372	5.30458	4.92808	2.23164	5.2919	2.16439	12.8329	1.68048	5.73441	1.08583	5.61393	3.72951	4.04559	1.03594	1.47197	1.31865	2.89634	0.773832	0	1.7611	3.47162	3.92849	3.58334	3.50049	1.89871	3.39917	2.47111
189	ASV6170	Bacteria	Firmicutes	Clostridia	Clostridiales	Clostridiaceae_1	Sarcina	0	0.010876	0	0	0	0	0	0	0	0	0	0	0	0	0	0	0	0	0	0	0	0	0	0	0	0	0	0	0	0	0	0	0	0	0	0	0	0	0	0	0	0
190	ASV6189	Bacteria	Synergistetes	Synergistia	Synergistales	Synergistaceae	Pyramidobacter	0.00215846	0.000731486	0.0121703	0.00579943	0	0	0	0	0	0	0.175074	0.0431691	0	0	0	0	0	0	0	0	0	0	0	0	0	0.0394355	0	0	0	0.0167269	0	0	0	0	0	0	0	0	0	0	0	0
191	ASV6191	Bacteria	Epsilonbacteraeota	Campylobacteria	Campylobacterales	Helicobacteraceae	Helicobacter	0.0146013	0	0	0	0	0	0	0	0	0	0	0.292026	0	0	0	0	0	0	0	0	0	0	0	0	0	0	0	0	0	0	0	0	0	0	0	0	0	0	0	0	0	0
192	ASV6206	Bacteria	Firmicutes	Clostridia	Clostridiales	Lachnospiraceae	UC5-1-2E3	0.00982654	0.00806123	0.00024993	0.000737608	0	0	0	0	0	0	0	0	0	0	0	0	0	0	0	0	0	0	0	0	0	0	0	0	0	0	0	0	0	0.196531	0	0	0	0	0	0	0	0
193	ASV6219	Bacteria	Firmicutes	Clostridia	Clostridiales	Lachnospiraceae	Lactonifactor	0.000849652	0.0130396	0	0.00446337	0	0	0	0	0	0	0	0	0	0	0	0	0.0115317	0	0	0	0	0	0	0.00546135	0	0	0	0	0	0	0	0	0	0	0	0	0	0	0	0	0	0
194	ASV6221	Bacteria	Firmicutes	Clostridia	Clostridiales	Lachnospiraceae	Lachnospiraceae_FCS020_group	0.00497702	0.00881069	0.00312772	0.0134766	0	0	0	0	0.0416389	0.0885335	0	0	0	0	0	0	0	0	0	0	0	0	0	0	0	0	0.0177878	0	0	0	0	0	0	0	0.0110069	0	0	0	0	0	0	0
195	ASV6321	Bacteria	Proteobacteria	Gammaproteobacteria	Enterobacteriales	Enterobacteriaceae	Enterobacter	0.0144905	0.0051218	0.00311333	0	0	0	0	0	0	0	0	0	0	0	0	0	0	0	0	0	0	0	0	0	0	0.0591533	0	0	0	0	0	0	0	0	0	0	0	0	0	0	0	0
196	ASV6367	Bacteria	Synergistetes	Synergistia	Synergistales	Synergistaceae	Synergistes	0	0	0.00444761	0.00982682	0	0	0	0	0	0	0	0	0	0	0	0	0	0	0	0	0	0	0	0	0	0.0845047	0	0	0	0	0	0	0	0	0	0	0	0	0	0	0	0
197	ASV6368	Bacteria	Firmicutes	Clostridia	Clostridiales	Lachnospiraceae	FD2005	0	0	0.0158563	0.0153159	0	0	0	0	0	0	0	0	0	0	0	0	0	0	0	0	0	0	0	0	0	0	0	0	0	0.210759	0	0.0905105	0	0	0	0	0	0	0	0	0	0
198	ASV64	Bacteria	Firmicutes	Clostridia	Clostridiales	Lachnospiraceae	Fusicatenibacter	1.59097	1.69024	1.34994	1.17728	3.62605	3.32415	1.75905	0.935158	0.885521	0.659717	0.804324	1.37633	0.892213	1.18521	1.407	2.77176	0.4728	3.08762	1.12971	3.66467	0.867543	0.438246	0.775859	0.838317	1.31957	0.901383	1.24515	0.728891	1.2254	1.02369	1.26285	1.4312	1.35652	1.98525	0.145841	1.10229	1.96885	0.830837	0.655657	4.13435	1.79487	0.807798
199	ASV640	Bacteria	Firmicutes	Erysipelotrichia	Erysipelotrichales	Erysipelotrichaceae	Holdemanella	0.215957	0.184023	1.97418	0.858132	0	10.7987	0	0	0	1.29088	4.78788	0	0	1.4434	3.02827	0	0	0	0	0	0	0	8.75896	0	0	1.48447	0	0	3.05586	2.5358	1.13363	3.12261	0	0	0	0	0	0.0508676	0	0	0	0.0340843
200	ASV6417	Bacteria	Firmicutes	Clostridia	Clostridiales	Lachnospiraceae	ASF356	0.00536584	0.00939687	0.0020926	0.00122527	0.0397593	0	0	0	0	0	0	0	0	0	0	0	0	0	0	0	0	0	0	0	0	0	0	0	0	0	0	0	0	0	0.107317	0	0	0	0	0	0	0
201	ASV6435	Bacteria	Firmicutes	Bacilli	Lactobacillales	Leuconostocaceae	Weissella	0.011068	0.00231307	0.00178483	0.0107503	0	0	0.0427546	0.0103142	0	0	0	0	0.168292	0	0	0	0	0	0	0	0	0	0	0	0	0	0	0	0	0	0	0	0	0	0	0	0	0.0339117	0	0	0	0
202	ASV6499	Bacteria	Verrucomicrobia	Verrucomicrobiae	Opitutales	Puniceicoccaceae	Cerasicoccus	0	0.0022795	0.0134207	0.0421721	0.0556631	0	0	0	0.174883	0	0	0	0	0	0	0	0	0	0	0	0	0	0	0	0	0	0	0	0.0244469	0	0	0	0	0	0	0	0	0	0	0	0	0
203	ASV6509	Bacteria	Proteobacteria	Deltaproteobacteria	Desulfovibrionales	Desulfovibrionaceae	Mailhella	0.01083	0.00885616	0.00380079	0.00265274	0	0	0	0.216599	0.0693982	0	0	0	0	0	0	0	0	0	0	0	0	0	0	0	0	0.00281682	0	0	0	0	0	0	0	0	0	0	0	0	0	0	0	0
204	ASV6518	Bacteria	Firmicutes	Clostridia	Clostridiales	Ruminococcaceae	GCA-900066225	0.0175391	0.0169646	0.028277	0.0227694	0.121929	0	0	0	0.0666223	0	0.172536	0	0.203019	0	0.0877759	0	0.0144146	0	0	0	0.059625	0	0	0	0	0	0.0088939	0	0	0	0.0117474	0.0593975	0	0.0455724	0	0	0	0.00847793	0.167343	0	0.12474	0
205	ASV6543	Bacteria	Firmicutes	Clostridia	Clostridiales	Defluviitaleaceae	Defluviitaleaceae_UCG-011	0.0441454	0.02201	0.0115934	0.0135876	0	0	0.0274851	0	0.0832778	0.21705	0	0.027933	0.0507546	0	0.0955208	0	0.0461268	0	0	0.013598	0	0.0747596	0	0.0354988	0.026628	0	0.0266817	0.0342432	0	0.0167269	0	0	0	0	0.173358	0	0	0.0593455	0.00823	0.126347	0.0623701	0.119295
206	ASV6568	Bacteria	Firmicutes	Bacilli	Lactobacillales	Carnobacteriaceae	Granulicatella	0.0322048	0.0040819	0.0166452	0.0010204	0	0	0.0732936	0.044695	0	0	0.0710444	0.0101574	0.00801389	0	0	0.100449	0.0144146	0.0121083	0.0578744	0	0	0.00257792	0	0	0.0147933	0.0619701	0	0.0464729	0.0183352	0	0.0117474	0	0.0277469	0	0	0.119814	0	0	0	0	0	0
207	ASV6597	Bacteria	Firmicutes	Clostridia	Clostridiales	Lachnospiraceae	Syntrophococcus	0	0	0.00919174	0.00446674	0	0	0	0	0	0	0	0	0	0	0	0	0	0	0	0	0	0	0	0	0	0.174643	0	0	0	0	0	0	0	0	0	0	0	0	0	0	0	0
208	ASV6616	Bacteria	Firmicutes	Clostridia	Clostridiales	Lachnospiraceae	Eisenbergiella	0.013639	0.0173785	0.000776506	0.0193742	0	0	0	0	0	0	0	0.099035	0	0.0147536	0	0	0	0	0	0	0	0	0	0	0	0	0	0	0	0	0	0	0	0.173745	0	0	0	0	0	0.136876	0	0.368111
209	ASV664	Bacteria	Proteobacteria	Gammaproteobacteria	Betaproteobacteriales	Burkholderiaceae	Sutterella	0.697834	0.962767	0.799066	1.56078	0.355183	0.0854782	0.421438	0.189094	0.732845	1.4965	0.999696	1.01574	0.846801	2.09747	0.570543	1.36548	0.216219	0.387465	2.05107	0.233433	1.63372	0	0.726336	0	2.18646	0.526746	0	0.80227	0.663122	0.715911	1.93539	1.83001	0.850906	0	0.244902	1.288	0	0.101735	0.718753	1.11957	0	0.0988445
210	ASV6649	Bacteria	Actinobacteria	Actinobacteria	Actinomycetales	Actinomycetaceae	Actinomyces	0.023818	0.00272592	0.0312906	0.00793258	0	0.0791465	0	0.085952	0	0	0	0	0	0.0344251	0	0.106727	0.13838	0	0	0	0	0.0592921	0	0	0	0.0422523	0	0.088054	0	0.204068	0	0	0.0400789	0.00854482	0	0	0	0.0423896	0	0	0	0.119295
211	ASV6661	Bacteria	Firmicutes	Clostridia	Clostridiales	Ruminococcaceae	DTU089	0.0328527	0.0388234	0.0244316	0.0334745	0	0	0	0.0378189	0	0.0428388	0	0.104114	0	0	0.0129082	0	0.0201805	0	0	0.0453268	0	0.0979609	0	0	0	0.0985888	0.124515	0	0	0.0702529	0	0	0.015415	0.0854482	0.0495308	0.107833	0	0.155429	0	0.038606	0.322245	0.139746
212	ASV6715	Bacteria	Actinobacteria	Actinobacteria	Corynebacteriales	Corynebacteriaceae	Lawsonella	0.000509165	0.00210578	0.000446598	0.0107635	0	0	0	0	0	0	0	0	0	0	0	0	0	0	0	0	0	0	0	0	0	0	0	0	0	0	0	0.00848536	0	0	0	0	0	0	0	0.0421156	0	0.204506
213	ASV675	Bacteria	Firmicutes	Negativicutes	Selenomonadales	Veillonellaceae	Megamonas	0.213869	0.292412	1.13852	0.584566	0	0	0	0	0	2.1448	0	0	0	0.872922	0	0	0	0	0	0	0	0	0.217901	0	0	0	0	1.48469	0	0	0	0	0	0	2.13258	0	0	0	0	0	0	0
214	ASV676	Bacteria	Firmicutes	Erysipelotrichia	Erysipelotrichales	Erysipelotrichaceae	Asteroleplasma	0.123626	1.313	0.359715	0.889115	0	0	0	0	6.65112	0	0	0	0	0	0	0	0	2.47251	0	0	0	0	0	0	0	0.00281682	0	0	0	0.18065	0	0	0	0	0	0	0	0	0	0	0	0
215	ASV6797	Bacteria	Firmicutes	Clostridia	Clostridiales	Lachnospiraceae	Lachnospiraceae_NC2004_group	0.0156189	0.00585189	0.000624133	0	0	0	0	0	0	0	0	0	0	0	0.312379	0	0	0	0	0	0	0	0	0	0	0	0.0118585	0	0	0	0	0	0	0	0	0	0	0	0	0	0	0
216	ASV6815	Bacteria	Firmicutes	Clostridia	Clostridiales	Ruminococcaceae	Caproiciproducens	0.024349	0.0111191	0.0126777	0.00742972	0.0318075	0	0	0.0171904	0.0138796	0	0	0.0533266	0.0213704	0	0.0542145	0.0219732	0.00576585	0	0	0.106518	0	0	0.0231107	0	0.0414213	0.0112673	0.0592926	0.00244594	0.021391	0.0568714	0	0	0.012332	0.1652	0	0	0	0.00847793	0	0	0.02079	0
217	ASV6829	Bacteria	Proteobacteria	Gammaproteobacteria	Betaproteobacteriales	Burkholderiaceae	Oxalobacter	0.00245049	0.0120513	0.0167627	0.0337601	0.0662655	0	0	0	0.00555185	0	0	0	0	0	0	0	0.0490097	0	0	0	0.0804937	0	0.0396183	0	0	0	0.0474341	0	0	0	0	0	0	0	0	0	0	0.0791273	0	0	0.0519751	0
218	ASV6891	Bacteria	Actinobacteria	Coriobacteriia	Coriobacteriales	Atopobiaceae	Coriobacteriaceae_UCG-003	0.00158644	0.00727839	0	0	0	0	0	0	0	0	0	0	0	0	0	0	0	0	0	0.0317288	0	0	0	0	0	0	0	0	0	0	0	0	0	0	0	0	0	0	0	0	0	0
219	ASV6921	Bacteria	Firmicutes	Clostridia	Clostridiales	Lachnospiraceae	Tyzzerella	0.0199789	0.0546269	0	0	0	0	0	0	0	0	0	0	0	0	0	0	0	0	0	0	0	0.399577	0	0	0	0	0	0	0	0	0	0	0	0	0	0	0	0	0	0	0	0
220	ASV693	Bacteria	Firmicutes	Clostridia	Clostridiales	Ruminococcaceae	Ruminococcaceae_UCG-002	1.18541	1.24327	1.87193	1.82459	2.43592	0.791465	1.82929	1.15519	1.70442	2.23333	2.0273	0.888776	1.69894	1.33766	1.61095	0.527357	0.838931	0.309972	0	3.52643	4.41523	0	3.74393	1.29434	0.917187	2.76612	1.06727	1.82712	1.9313	5.1017	0.511013	0.704285	1.48909	0.529779	3.23051	0	1.89821	1.16995	2.03555	1.93732	1.07415	0.818024
221	ASV6940	Bacteria	Epsilonbacteraeota	Campylobacteria	Campylobacterales	Campylobacteraceae	Campylobacter	0.000763747	0.0149293	0.000333248	0.0201456	0	0.00633172	0	0	0	0	0	0	0	0	0	0	0	0	0	0	0	0	0	0	0	0	0	0	0	0	0	0	0	0	0	0	0	0	0	0.19654	0	0.354477
222	ASV71	Bacteria	Actinobacteria	Actinobacteria	Bifidobacteriales	Bifidobacteriaceae	Bifidobacterium	4.78331	2.16213	2.10352	1.39013	2.84412	1.04157	3.89678	20.209	1.43515	2.82165	0.286715	1.75216	0.0881528	4.40641	7.0608	1.61346	14.3166	11.0525	9.29231	0	0.888412	0.515584	1.12912	3.33415	3.10068	6.54911	0.216418	1.34772	3.94512	0.18065	0.126285	0.280017	7.04772	3.17867	0.822762	0.137786	0.242651	4.32374	1.28662	1.03534	0.25641	1.1316
223	ASV7113	Bacteria	Firmicutes	Bacilli	Lactobacillales	Streptococcaceae	Lactococcus	0.0138825	0.0248026	0.00439151	0.0016882	0	0	0.0427546	0	0	0	0	0	0.0801389	0	0	0	0	0	0.122694	0	0.011925	0	0.0528245	0	0	0	0	0	0	0	0	0	0	0.0142414	0	0	0	0	0	0	0	0
224	ASV713	Bacteria	Firmicutes	Negativicutes	Selenomonadales	Acidaminococcaceae	Phascolarctobacterium	0.978936	1.01391	1.00719	1.09774	0	0.636338	0.848985	1.02455	0.755052	1.56504	0.256267	0.721178	0	1.28848	0.0981025	1.04216	0.0922536	0	0	1.1853	3.16907	1.81743	1.78283	1.45272	0.017752	0	0	0.506311	0.663122	1.09728	1.54185	2.49187	0	1.60927	1.56022	2.15366	2.11015	2.39643	0	1.03183	0	1.50994
225	ASV7156	Bacteria	Proteobacteria	Gammaproteobacteria	Enterobacteriales	Enterobacteriaceae	Hafnia-Obesumbacterium	0	0.032874	0	0	0	0	0	0	0	0	0	0	0	0	0	0	0	0	0	0	0	0	0	0	0	0	0	0	0	0	0	0	0	0	0	0	0	0	0	0	0	0
226	ASV72	Bacteria	Verrucomicrobia	Verrucomicrobiae	Verrucomicrobiales	Akkermansiaceae	Akkermansia	3.01103	1.54472	1.7993	2.22774	0	1.54494	0.989464	0.42976	2.07084	2.89876	1.88775	0.67547	0.558301	0.127865	0	0	0	0	0	0.81135	3.90543	0	0	0	0	0.377454	4.71673	0.914783	2.88168	0.317811	0.393539	0.478009	0	20.0404	3.95971	22.1267	0	14.209	0	0	1.08108	26.0472
227	ASV7237	Bacteria	Firmicutes	Erysipelotrichia	Erysipelotrichales	Erysipelotrichaceae	Erysipelotrichaceae_UCG-004	0.000763475	0.00438849	0.0143764	0.0101883	0	0	0.0152695	0	0	0	0	0	0	0	0	0	0	0	0	0	0	0	0	0	0	0	0	0	0.0641731	0.0568714	0	0	0	0	0	0	0.0645023	0.0876053	0	0	0	0
228	ASV7290	Bacteria	Firmicutes	Clostridia	Clostridiales	Family_XI	Finegoldia	0.00329699	0.00241341	0	0.0184758	0	0	0	0	0	0	0	0	0	0	0	0	0.00576585	0	0	0	0	0	0	0	0.00295867	0	0	0	0	0	0	0	0	0.00854482	0	0	0	0	0	0.00701927	0	0.334026
229	ASV7328	Bacteria	Firmicutes	Erysipelotrichia	Erysipelotrichales	Erysipelotrichaceae	Holdemania	0.0231431	0.0226352	0.0112933	0.0200618	0.0238556	0	0.0122156	0	0	0.00571184	0.0532833	0.0736414	0	0.0270483	0	0.0251122	0	0	0.0486145	0.0113317	0.011925	0.0592921	0	0.00546135	0.071008	0	0	0.00978378	0	0	0	0.0763683	0.00616599	0.0341793	0	0.0299536	0.00614307	0	0.01646	0.038606	0.0658351	0
230	ASV7337	Bacteria	Firmicutes	Bacilli	Bacillales	Bacillaceae	Virgibacillus	0.0549197	0	0	0	0	0	0	0	0	0	0	0	0	0	0	0	1.09839	0	0	0	0	0	0	0	0	0	0	0	0	0	0	0	0	0	0	0	0	0	0	0	0	0
231	ASV7358	Bacteria	Firmicutes	Clostridia	Clostridiales	Lachnospiraceae	Lachnospiraceae_NK4B4_group	0	0.00453521	0.0160985	0.0105268	0	0	0	0	0	0	0	0	0	0	0	0	0	0	0	0	0	0	0	0	0	0	0.0148232	0	0	0.291048	0	0	0	0	0	0	0	0	0	0	0.142065	0.0579434
232	ASV739	Bacteria	Firmicutes	Clostridia	Clostridiales	Ruminococcaceae	CAG-352	0.369781	0.326157	0.80878	0.350256	0	0	0	0	8.29725	0	0	0	0	0	0	0	0	0	0	0	0	0	0	0	0	0	0	3.32893	0	0	2.37004	0	0	0	0	0	0.141291	1.2293	0	0	0	1.30884
233	ASV750	Bacteria	Firmicutes	Clostridia	Clostridiales	Ruminococcaceae	Ruminococcaceae_UCG-003	0.167195	0.226552	0.284487	0.474423	0.720969	0.110805	0.271797	0.0481331	0.199867	0.27988	0.261342	0.0203149	0.16562	0.457362	0.0929392	0.32332	0.0864877	0.133191	0.212978	0.652706	0.31005	0	0.623989	0.461484	0.159768	0.154925	0	0.210351	0.516441	0.956778	0.161527	0.149908	0.15415	0	0.0165103	0	0.31944	0	0.6584	0.400098	0	0
234	ASV7581	Bacteria	Firmicutes	Bacilli	Bacillales	Bacillaceae	Bacillus	0.0131173	0	0	0	0	0	0	0	0	0	0	0	0	0	0	0	0.262346	0	0	0	0	0	0	0	0	0	0	0	0	0	0	0	0	0	0	0	0	0	0	0	0	0
235	ASV767	Bacteria	Firmicutes	Clostridia	Clostridiales	Ruminococcaceae	Ruminococcaceae_NK4A214_group	0.204423	0.247831	0.514815	0.399905	0.763379	0.414728	0.131318	0.330056	0.405285	0.291304	0.776413	0.215846	0.14425	0.218845	0.472441	0.213454	0.18739	0.0823364	0	0.809083	0.569418	0.0799154	0.274027	0.314027	0	0.47886	0.681865	0.393797	0.421709	1.87676	0.126285	0	0.0832408	0	0.269668	0	0.571306	1.57124	0.850433	0.501878	1.09494	1.27475
236	ASV7688	Bacteria	Actinobacteria	Actinobacteria	Actinomycetales	Actinomycetaceae	Mobiluncus	0.000442458	0.00368512	0	0.00448478	0	0	0	0	0	0	0	0	0	0	0	0	0	0	0	0	0	0	0	0	0	0	0	0	0	0	0	0	0	0	0	0	0	0	0	0.0737023	0	0.0852108
237	ASV7807	Bacteria	Actinobacteria	Coriobacteriia	Coriobacteriales	Eggerthellaceae	DNF00809	0	0.00139834	0	0.00918954	0	0	0	0	0	0	0	0	0	0	0	0	0	0	0	0	0	0	0	0	0	0	0	0	0	0	0	0	0	0	0	0	0	0	0	0	0	0
238	ASV7814	Bacteria	Firmicutes	Clostridia	Clostridiales	Ruminococcaceae	Anaerotruncus	0.0123143	0.0264822	0.011266	0.00885476	0	0	0	0	0	0	0.111641	0.0711021	0	0	0.0206532	0	0	0	0	0	0.0208687	0.0283571	0	0.0464215	0	0	0	0	0.0336145	0	0	0.0141423	0	0.0797516	0	0	0.0337869	0	0	0	0.0658351	0
239	ASV7847	Bacteria	Bacteroidetes	Bacteroidia	Bacteroidales	Rikenellaceae	dgA-11_gut_group	0	0	0.00431333	0.00789321	0	0	0	0	0	0	0	0	0	0	0	0	0	0	0	0	0	0	0	0	0	0	0	0	0	0	0	0	0	0	0	0	0	0.0819533	0	0	0	0.149971
240	ASV7849	Bacteria	Firmicutes	Clostridia	Clostridiales	Family_XIII	S5-A14a	0.000295867	0.00298319	0.000324526	0.00789321	0	0	0	0	0	0	0	0	0	0	0	0	0	0	0	0	0	0	0	0	0.00591733	0	0	0	0	0	0	0	0.00616599	0	0	0	0	0	0	0.0596638	0	0.149971
241	ASV7972	Bacteria	Firmicutes	Clostridia	Clostridiales	Lachnospiraceae	GCA-900066755	0.00629104	0.00133282	0.000400626	0.000850074	0	0	0	0	0	0	0.00761189	0.106653	0	0	0	0.00627806	0	0	0	0	0	0.0128896	0	0	0	0	0	0	0	0	0	0	0	0	0	0	0	0	0	0	0	0
242	ASV7991	Bacteria	Actinobacteria	Coriobacteriia	Coriobacteriales	Eggerthellaceae	CHKCI002	0.00541363	0.00532932	0.00866287	0.00415471	0	0	0	0	0	0	0	0	0	0.0688502	0	0	0	0	0	0	0	0.108273	0.0957443	0	0	0	0	0	0	0	0	0	0	0	0	0	0	0	0	0	0	0
243	ASV800	Bacteria	Firmicutes	Clostridia	Clostridiales	Ruminococcaceae	Ruminococcaceae_UCG-005	0.63637	0.604854	1.01867	0.902213	1.73086	0.598347	0.763475	1.04861	0.941039	2.43039	0.603877	0.380904	0.248431	0.447526	1.08171	0.583859	0.712082	0.0702281	0	1.00626	1.51447	0.435668	1.78283	1.14688	0.366875	1.16898	1.04948	1.24499	1.29569	2.13435	0.684288	0.6958	0.332963	0	0.553094	0	1.1979	1.88775	1.37715	0.772119	2.05128	1.58151
244	ASV8021	Bacteria	Firmicutes	Clostridia	Clostridiales	Eubacteriaceae	Eubacterium	0.00195324	0.00603901	0.00920737	0.00540996	0	0.00949758	0	0	0	0	0	0	0	0	0	0	0	0	0	0	0	0.00773375	0.00660306	0	0	0.00563364	0.0177878	0	0	0.0167269	0	0	0	0.031331	0	0	0	0.118691	0	0	0.02772	0.0545349
245	ASV8032	Bacteria	Firmicutes	Clostridia	Clostridiales	Peptostreptococcaceae	Peptostreptococcus	0.00359646	0.00285569	0	0	0	0	0	0	0	0	0	0	0	0	0	0.0188342	0	0	0	0	0	0	0	0	0	0	0	0	0	0	0	0	0	0	0	0	0	0	0	0	0	0
246	ASV804	Bacteria	Firmicutes	Erysipelotrichia	Erysipelotrichales	Erysipelotrichaceae	Catenibacterium	0.395176	0.271603	0.479858	0.322481	0	0	0	0	0	0.00571184	0.969248	0	0	0	0	0	4.68187	0	0	3.21594	0	0	1.54842	0	0	0.568998	0	0	0	4.28877	0.701909	0	0	0	0	0	0	0	0	0	0	0
247	ASV8096	Bacteria	Firmicutes	Clostridia	Clostridiales	Lachnospiraceae	Acetitomaculum	0	0	0.00607841	0.00521119	0	0	0	0	0	0	0	0	0	0	0	0	0	0	0	0	0	0	0	0	0	0.11549	0	0	0	0	0	0	0	0	0	0	0	0	0	0	0	0
248	ASV8167	Bacteria	Firmicutes	Clostridia	Clostridiales	Ruminococcaceae	Ruminococcaceae_UCG-009	0.0194683	0.0153092	0.0207397	0.0187483	0.0477112	0	0.0152695	0.0103142	0	0	0.0456714	0.0558659	0.106852	0	0.080031	0	0	0	0	0	0.0566437	0	0	0.00546135	0	0.0338019	0	0.00733783	0.0580614	0.0401445	0	0	0	0	0.115572	0	0.0368584	0.0678234	0.0384067	0	0	0.0409012
249	ASV8199	Bacteria	Firmicutes	Clostridia	Clostridiales	Family_XI	Murdochiella	0.0004438	0.00368512	0	0.0186567	0	0	0	0	0	0	0	0	0	0	0	0	0	0	0	0	0	0	0	0	0.008876	0	0	0	0	0	0	0	0	0	0	0	0	0	0	0.0737023	0	0.354477
250	ASV8202	Bacteria	Firmicutes	Negativicutes	Selenomonadales	Veillonellaceae	Anaeroglobus	0	0	0.00024993	0.00754038	0	0	0	0	0	0	0	0	0	0	0	0	0	0	0	0	0	0	0	0	0	0	0	0	0	0	0	0	0	0	0	0	0	0	0	0	0.00693001	0.136337
251	ASV8491	Bacteria	Firmicutes	Erysipelotrichia	Erysipelotrichales	Erysipelotrichaceae	Solobacterium	0.00124989	0.00626728	0.023537	0.00490109	0	0	0	0	0	0	0	0	0	0	0	0	0	0.0121083	0	0	0	0.0128896	0	0	0	0	0	0	0	0.428208	0	0	0	0	0	0	0	0	0	0.0701927	0	0
252	ASV8501	Bacteria	Firmicutes	Clostridia	Clostridiales	Family_XI	Parvimonas	0.00602959	0.00768487	0.000327882	0.00831865	0	0	0	0	0	0	0	0	0	0	0	0.0219732	0.0576585	0	0	0	0	0	0	0.0409601	0	0	0	0	0	0	0	0	0	0	0	0	0	0	0	0.0912505	0	0.126112
253	ASV855	Bacteria	Firmicutes	Clostridia	Clostridiales	Lachnospiraceae	Lachnospiraceae_UCG-004	0.185164	0.271469	0.194297	0.29892	0.413497	0	0.427546	0	0	0.277024	0.205521	0.147283	0.114866	0.445067	0	0	0	0.314816	0.277797	0.287825	0.1431	0.466603	0	0.398678	0	0.290133	0	0.242149	0.22919	0	0.349486	0.288502	0.376125	0.093993	0.107317	0.326494	0.215008	0	0.375837	0	0	0
254	ASV8612	Bacteria	Synergistetes	Synergistia	Synergistales	Synergistaceae	Jonquetella	0	0	0	0.00645808	0	0	0	0	0	0	0	0	0	0	0	0	0	0	0	0	0	0	0	0	0	0	0	0	0	0	0	0	0	0	0	0	0	0	0	0	0	0.122704
255	ASV8638	Bacteria	Firmicutes	Clostridia	Clostridiales	Lachnospiraceae	Shuttleworthia	0	0.000592557	0.00118988	0.00614921	0	0	0	0	0	0	0	0	0	0	0	0	0	0	0	0	0	0	0	0	0	0	0	0	0	0	0	0	0	0	0	0	0	0.0226078	0	0	0	0
256	ASV872	Bacteria	Firmicutes	Clostridia	Clostridiales	Ruminococcaceae	Ruminococcaceae_UCG-014	0.871057	0.652625	2.7673	1.78116	10.47	1.89318	4.43732	0.763254	0.396958	1.02242	0	0.231082	0	0.548343	3.07216	0.301347	0.513161	0.11624	0	1.43006	2.34624	0	5.43432	1.01854	0	2.92386	9.19629	3.39008	4.55323	2.68634	1.18943	0.00565691	0.613516	0	2.23164	0.560132	3.54762	3.1764	7.00373	0.396589	9.74359	2.37227
257	ASV908	Bacteria	Firmicutes	Clostridia	Clostridiales	Ruminococcaceae	Ruminococcaceae_UCG-004	0.16364	0.201159	0.125988	0.13133	0	0.174122	0.253474	0.237228	0.0860537	0.105669	0.0989546	0.170137	0.186991	0.23114	0.222021	0.188342	0	0.10171	0	0.18584	0.2385	0.268103	0	0.234838	0.301784	0	0.349827	0	0.189463	0	0	0.189506	0	0	0.104565	0.134791	0.162791	0.542587	0	0.38255	0.280665	0.374928
258	ASV9140	Archaea	Euryarchaeota	Methanobacteria	Methanobacteriales	Methanobacteriaceae	Methanosphaera	0	0	0.0135313	0.00624521	0	0	0	0	0.0360871	0	0	0	0	0	0	0	0	0	0	0	0	0	0	0	0	0.0873215	0	0	0.0366703	0.0970159	0	0	0	0	0	0	0	0	0	0	0	0
259	ASV920	Bacteria	Proteobacteria	Deltaproteobacteria	Desulfovibrionales	Desulfovibrionaceae	Bilophila	0.165836	0.206172	0.216929	0.212679	0.352533	0.151961	0.280959	0.175342	0.111037	0.0885335	0.271491	0.297105	0.189662	0	0.00516329	0.282512	0.221985	0	0.173623	0.124649	0.64395	0.317084	0.217901	0.106496	0.2219	0.208445	0.533634	0.232365	0.0672289	0.207413	0.143906	0.429925	0.262055	0	0.187116	0.25161	0.15972	0.0734754	0.27982	0.112308	0.294525	0.0272675
260	ASV9357	Bacteria	Firmicutes	Clostridia	Clostridiales	Lachnospiraceae	CHKCI001	0	0.00409948	0	0	0	0	0	0	0	0	0	0	0	0	0	0	0	0	0	0	0	0	0	0	0	0	0	0	0	0	0	0	0	0	0	0	0	0	0	0	0	0
261	ASV936	Bacteria	Proteobacteria	Gammaproteobacteria	Enterobacteriales	Enterobacteriaceae	Escherichia/Shigella	0.336918	0.277124	0.127148	0.186548	0	0.823123	0	0	0.166556	0	0	0.182834	0.49419	0.18442	0.0671228	0.433186	0.640009	0	0	0	0.160987	0.0515584	0.0825382	0.0709975	0.103553	0.104222	0	0	0	0.26763	0	0	0.021581	4.18981	0.0357723	0	0	0.604759	0.0685833	2.68487	0.19404	0.743038
262	ASV9448	Bacteria	Firmicutes	Clostridia	Clostridiales	Peptostreptococcaceae	Paeniclostridium	0	0	0	0.00520234	0	0	0	0	0	0	0	0	0	0	0	0	0	0	0	0	0	0	0	0	0	0	0	0	0	0	0	0	0	0	0	0	0	0	0	0	0	0.0988445
263	ASV950	Bacteria	Firmicutes	Clostridia	Clostridiales	Ruminococcaceae	Ruminiclostridium_6	0.315422	0.191819	0.987101	0.327848	0.119278	0.0189952	0.0183234	0	8.36387	0.953877	7.61951	0.223464	2.34273	0.0319662	0.242675	0.0188342	0.00576585	0.0387465	0	0	0	0	0.0198092	1.71213	0.224859	0.0366187	0.589962	0.256824	0.345312	0.190686	0.528634	0.115967	0	0	0.341212	0	0.393157	0.124343	0.0137167	0	0.800416	0
264	ASV9597	Bacteria	Firmicutes	Clostridia	Clostridiales	Family_XI	Anaerococcus	0.00537136	0.00602152	0.000279013	0.0080726	0.00530124	0	0	0	0	0	0	0	0	0	0	0.00627806	0.0461268	0.00726498	0	0	0	0	0	0	0	0	0	0	0	0	0	0	0	0.0256345	0	0	0	0	0	0.0315867	0	0.153379
265	ASV9744	Bacteria	Firmicutes	Clostridia	Clostridiales	Ruminococcaceae	Ruminococcaceae_UCG-011	0.00455379	0.00411698	0.00203894	0.00162643	0	0	0	0	0	0	0	0	0	0.00737681	0	0	0	0	0	0.0113317	0	0	0	0	0	0	0.00592926	0	0	0	0	0	0	0	0.0110069	0	0	0.0254338	0	0	0.01386	0.0170422
266	ASV9782	Bacteria	Actinobacteria	Coriobacteriia	Coriobacteriales	Eggerthellaceae	Gordonibacter	0.00455356	0.000317299	0.0048945	0	0	0	0	0	0	0	0	0	0	0	0	0	0	0	0	0	0	0	0	0	0	0	0.0088939	0	0	0	0	0	0	0	0	0	0	0	0	0	0	0
[truncated: 40 more columns]
